# Supplementary material
Source: PubMed Central journal article supplement (PMC6350807)
Supplement: NIHMS1006714-supplement-EA2.pdf [file NIHMS1006714-supplement-EA2.pdf]

**Appendix EA2. Backscattered electron images of studied Murchison chondrules.**

Numbers associated with SIMS pits correspond to individual O-isotope data given in Appendix EA4.

**Homogeneous chondrules – 15 microns diameter spots**

**A5**

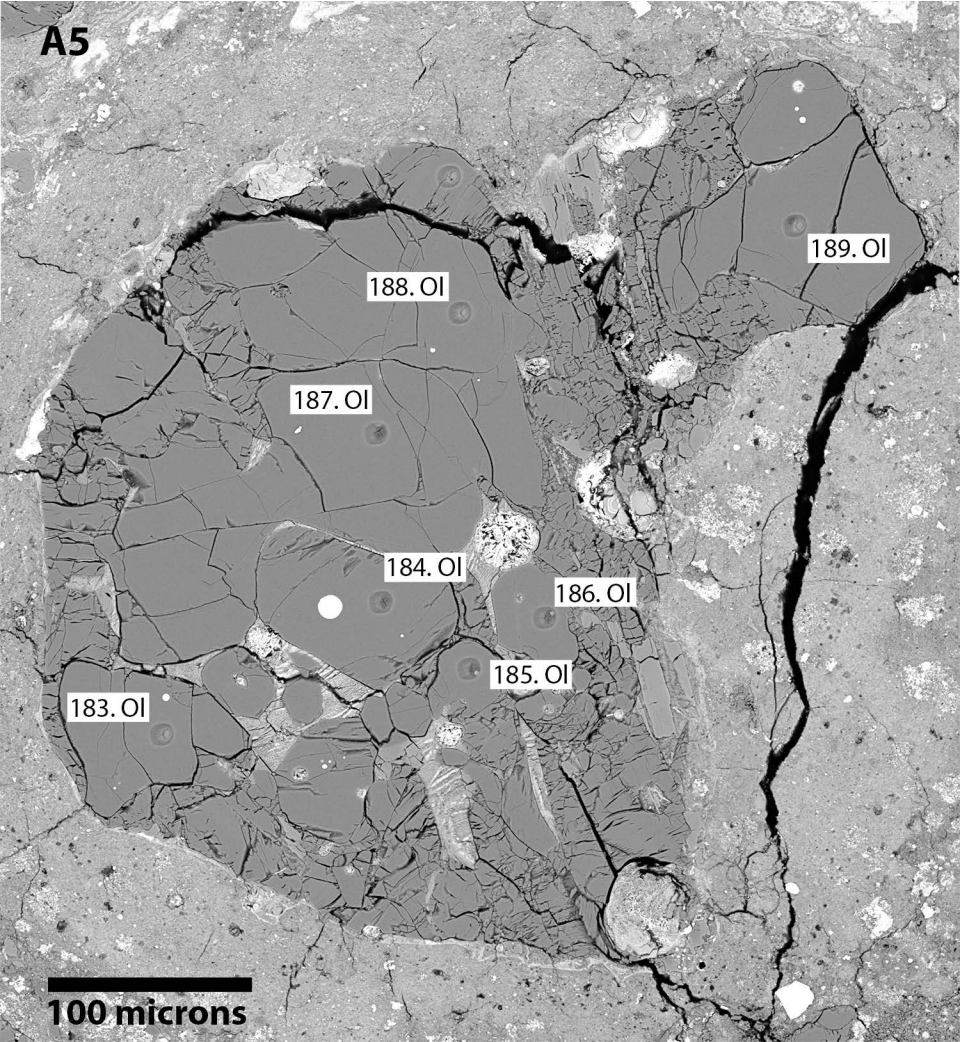

188.OI

189.OI

187.OI

184.OI

186.OI

185.OI

183.OI

**100 microns**

C2

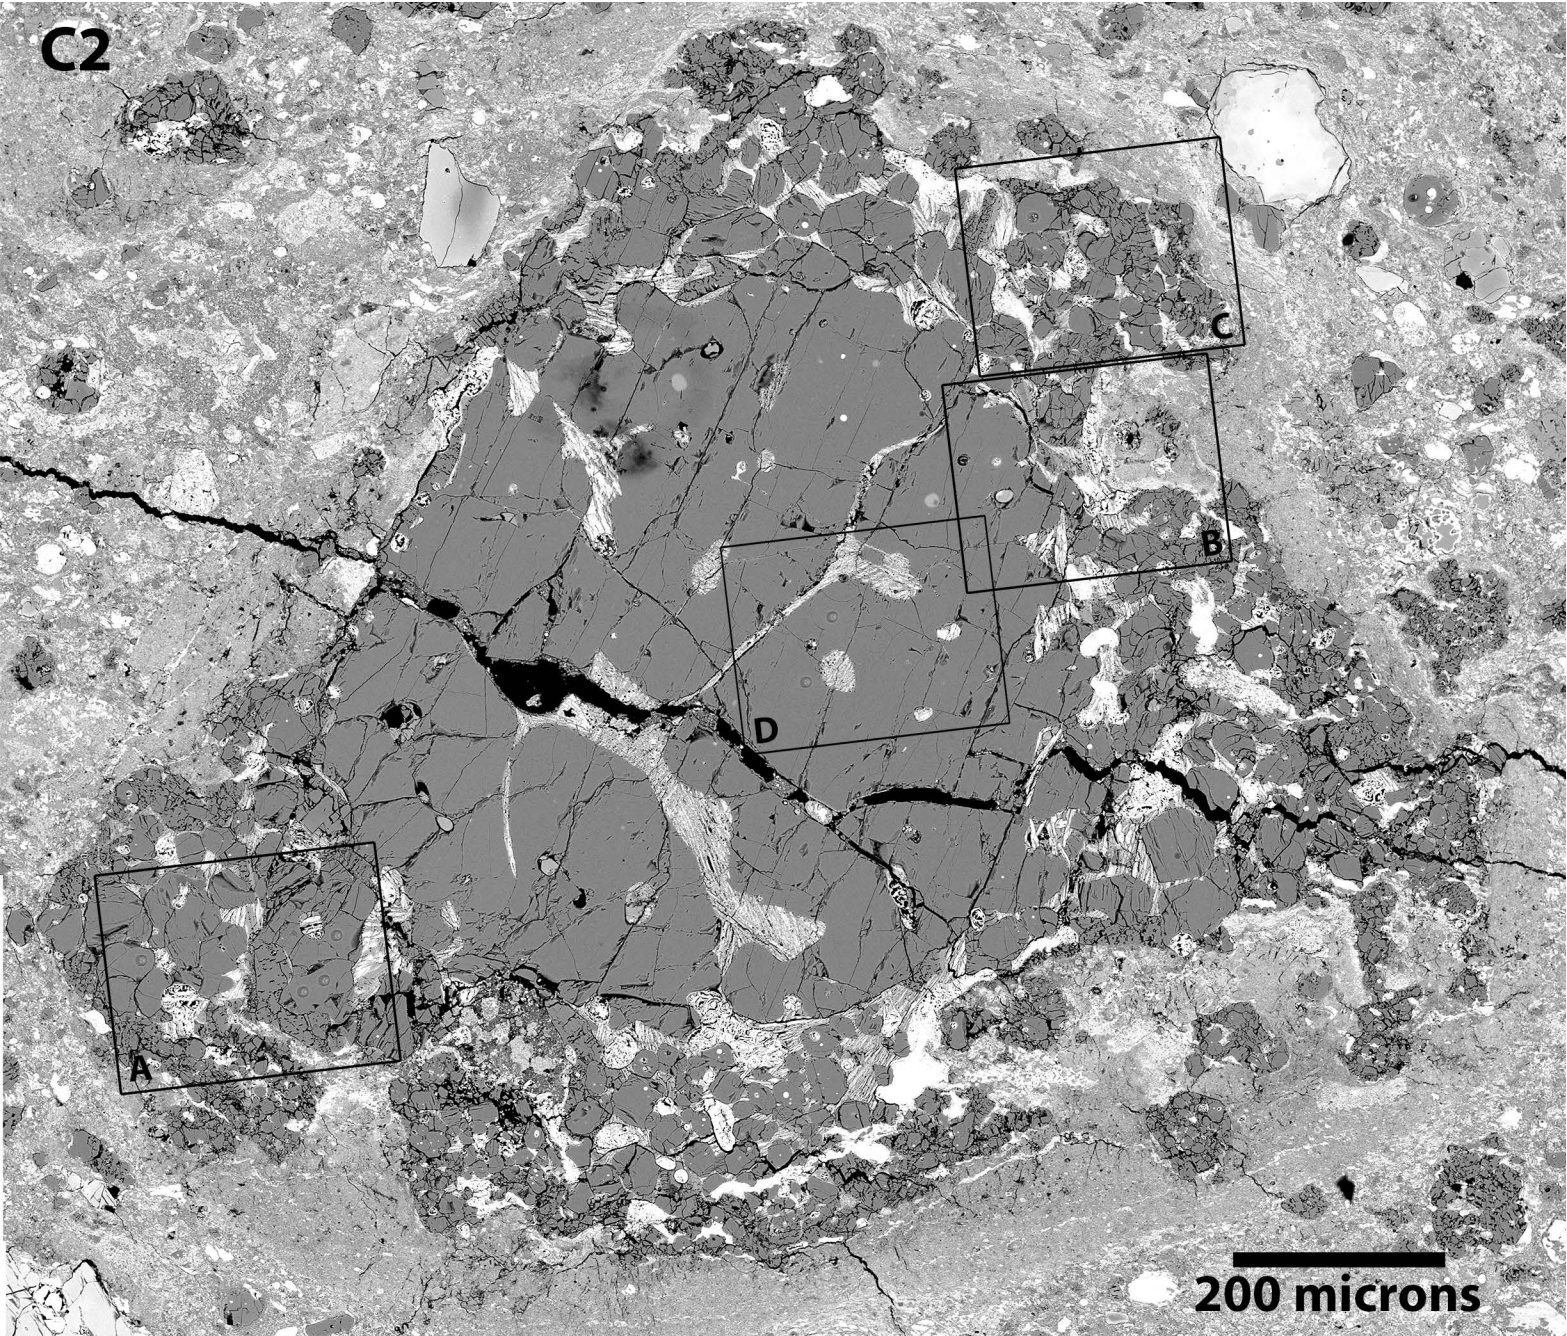

200 microns

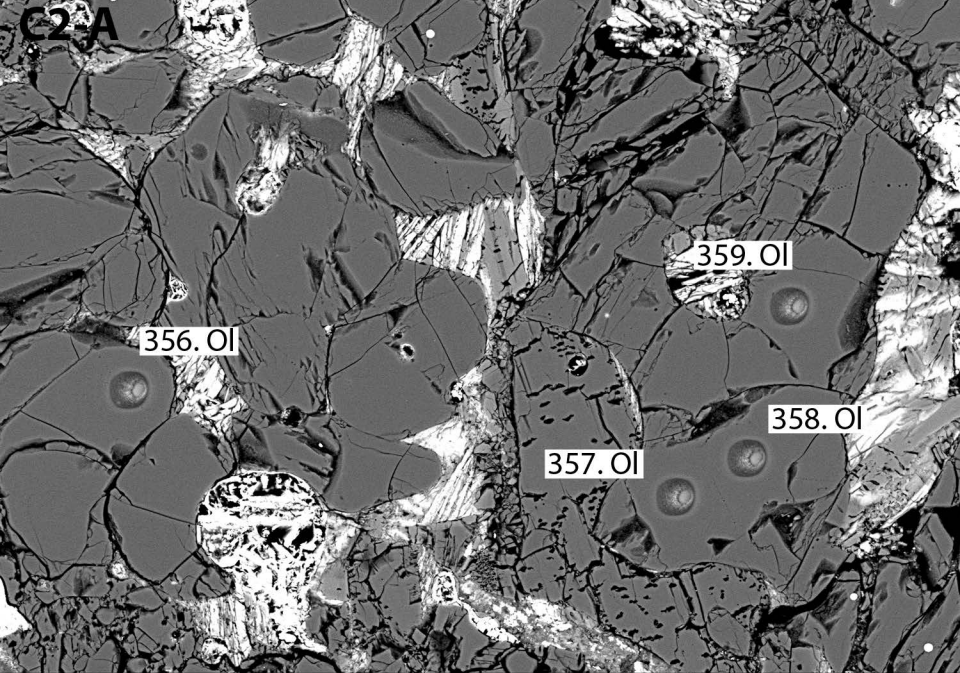

356.OI

359.OI

358.OI

357.OI

15.0kV x470 BSECOMP

100um

C2-B

362.01

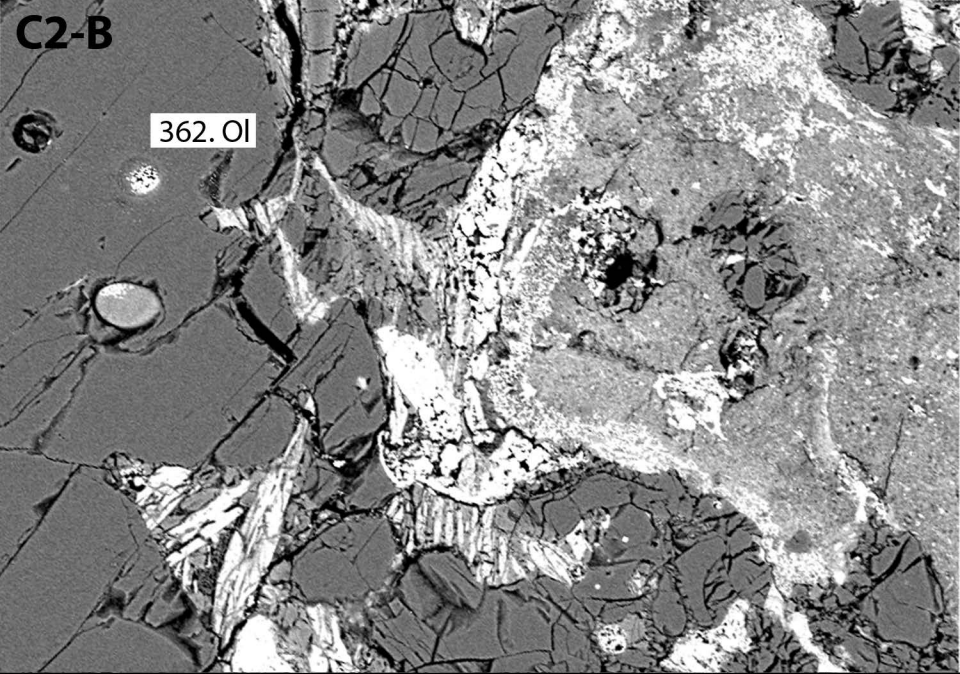

15.0kV x500 BSECOMP

100um

C2-C

363.01

15.0kV x500 BSECOMP

100um

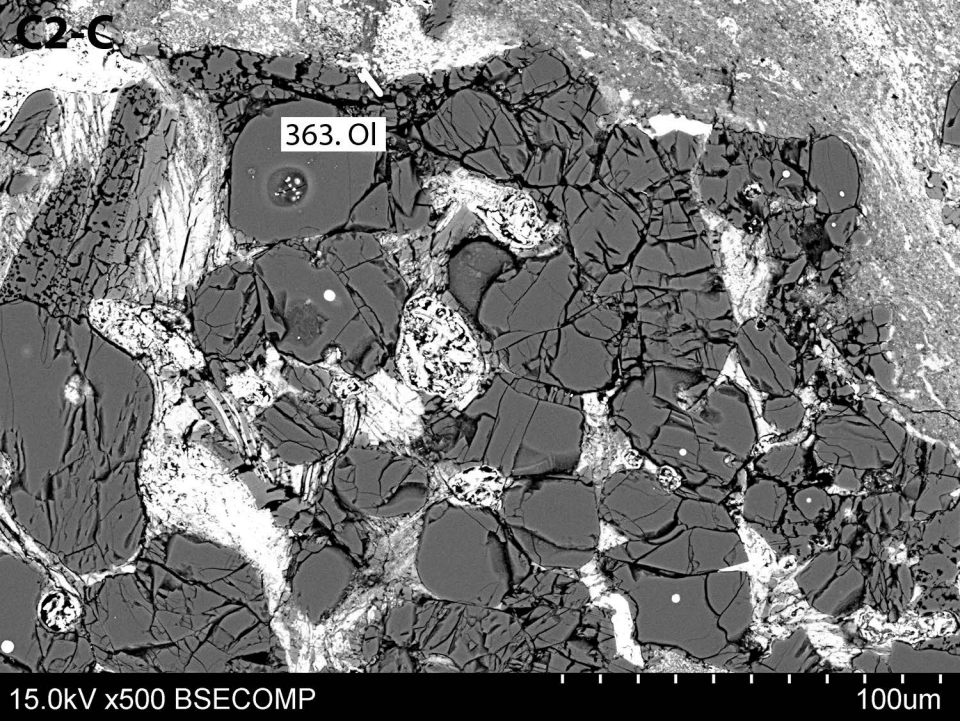

C2-D

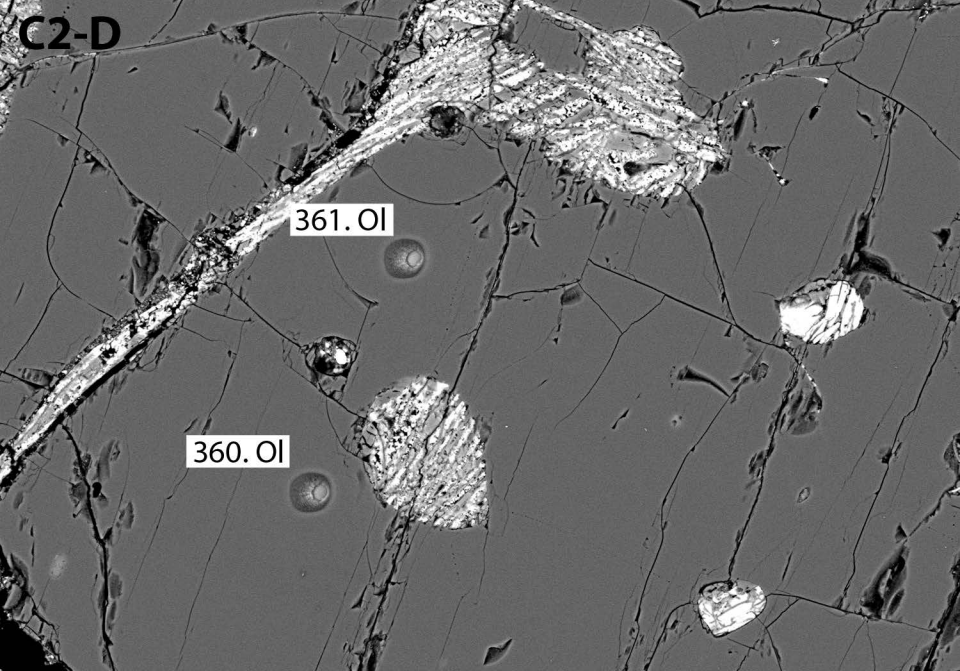

361. OI

360. OI

15.0kV x500 BSECOMP

100um



**A2**

100. OI

106. LPx

101. LPx

102. OI

103. OI

104. OI

105. OI

**100 microns**

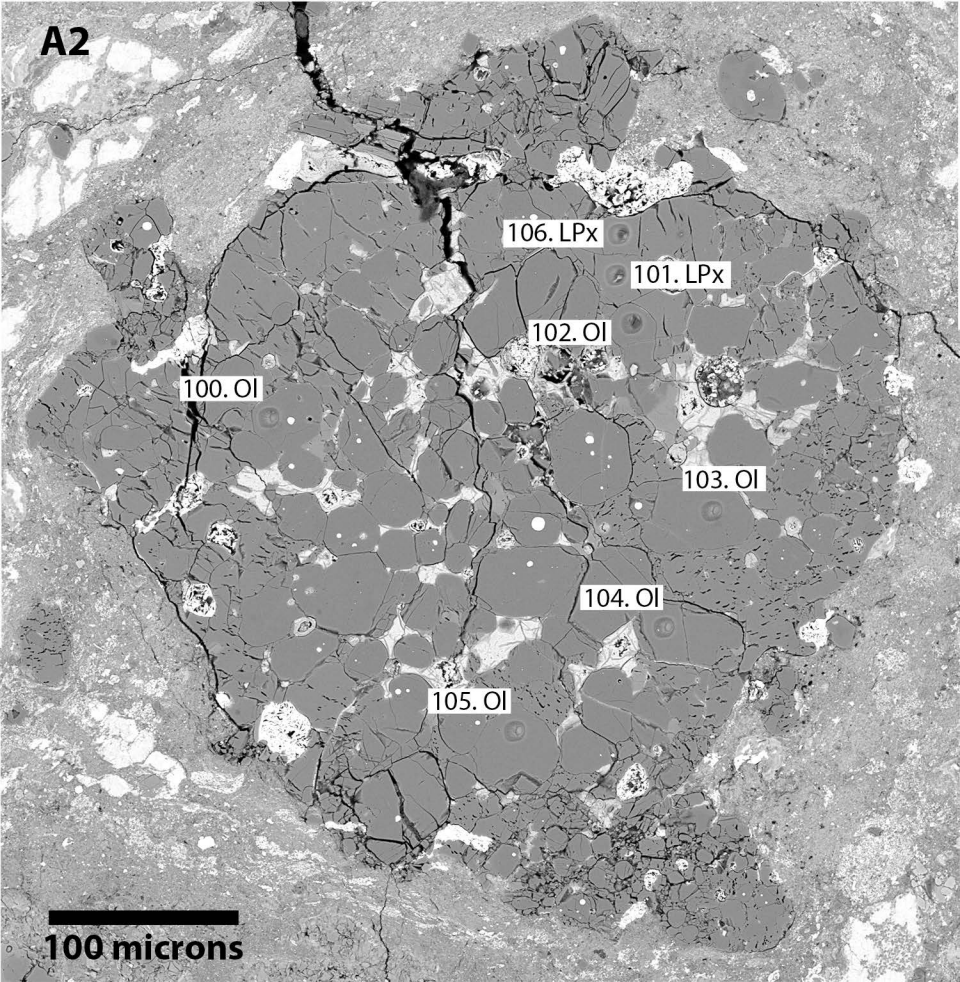

C9

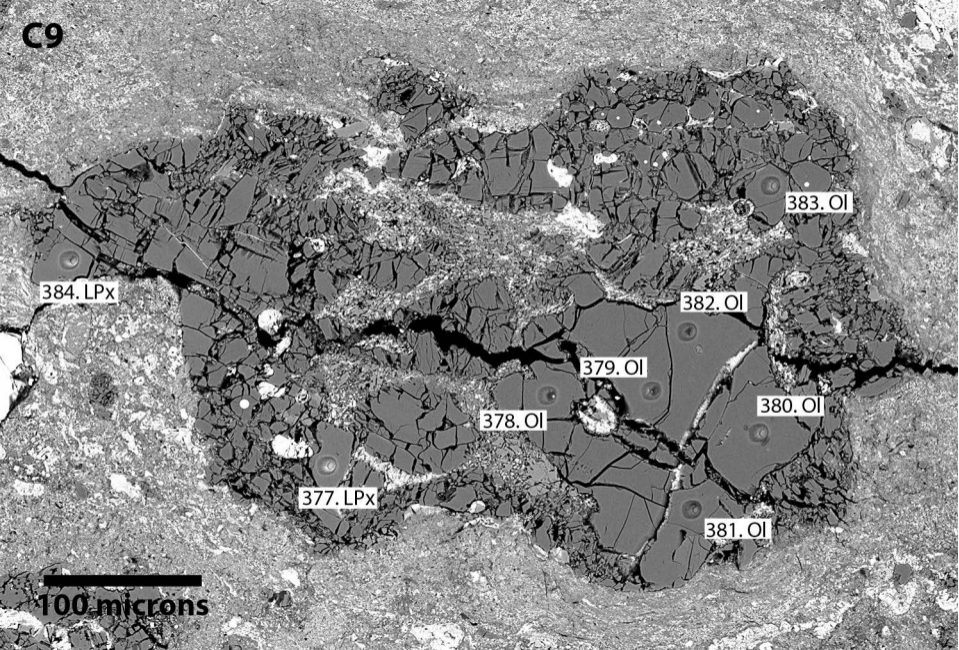

384.LPx

383.OI

382.OI

379.OI

380.OI

378.OI

377.LPx

381.OI

100 microns

**B5**

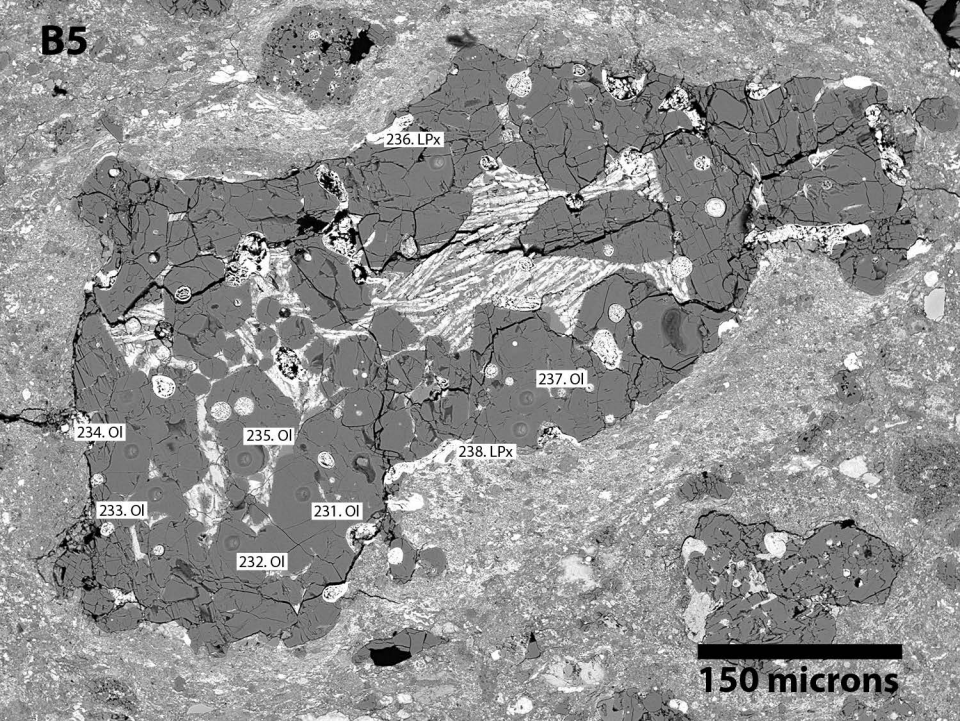

236.LPx

237.OI

238.LPx

234.OI

235.OI

233.OI

231.OI

232.OI

**150 microns**

**B2**

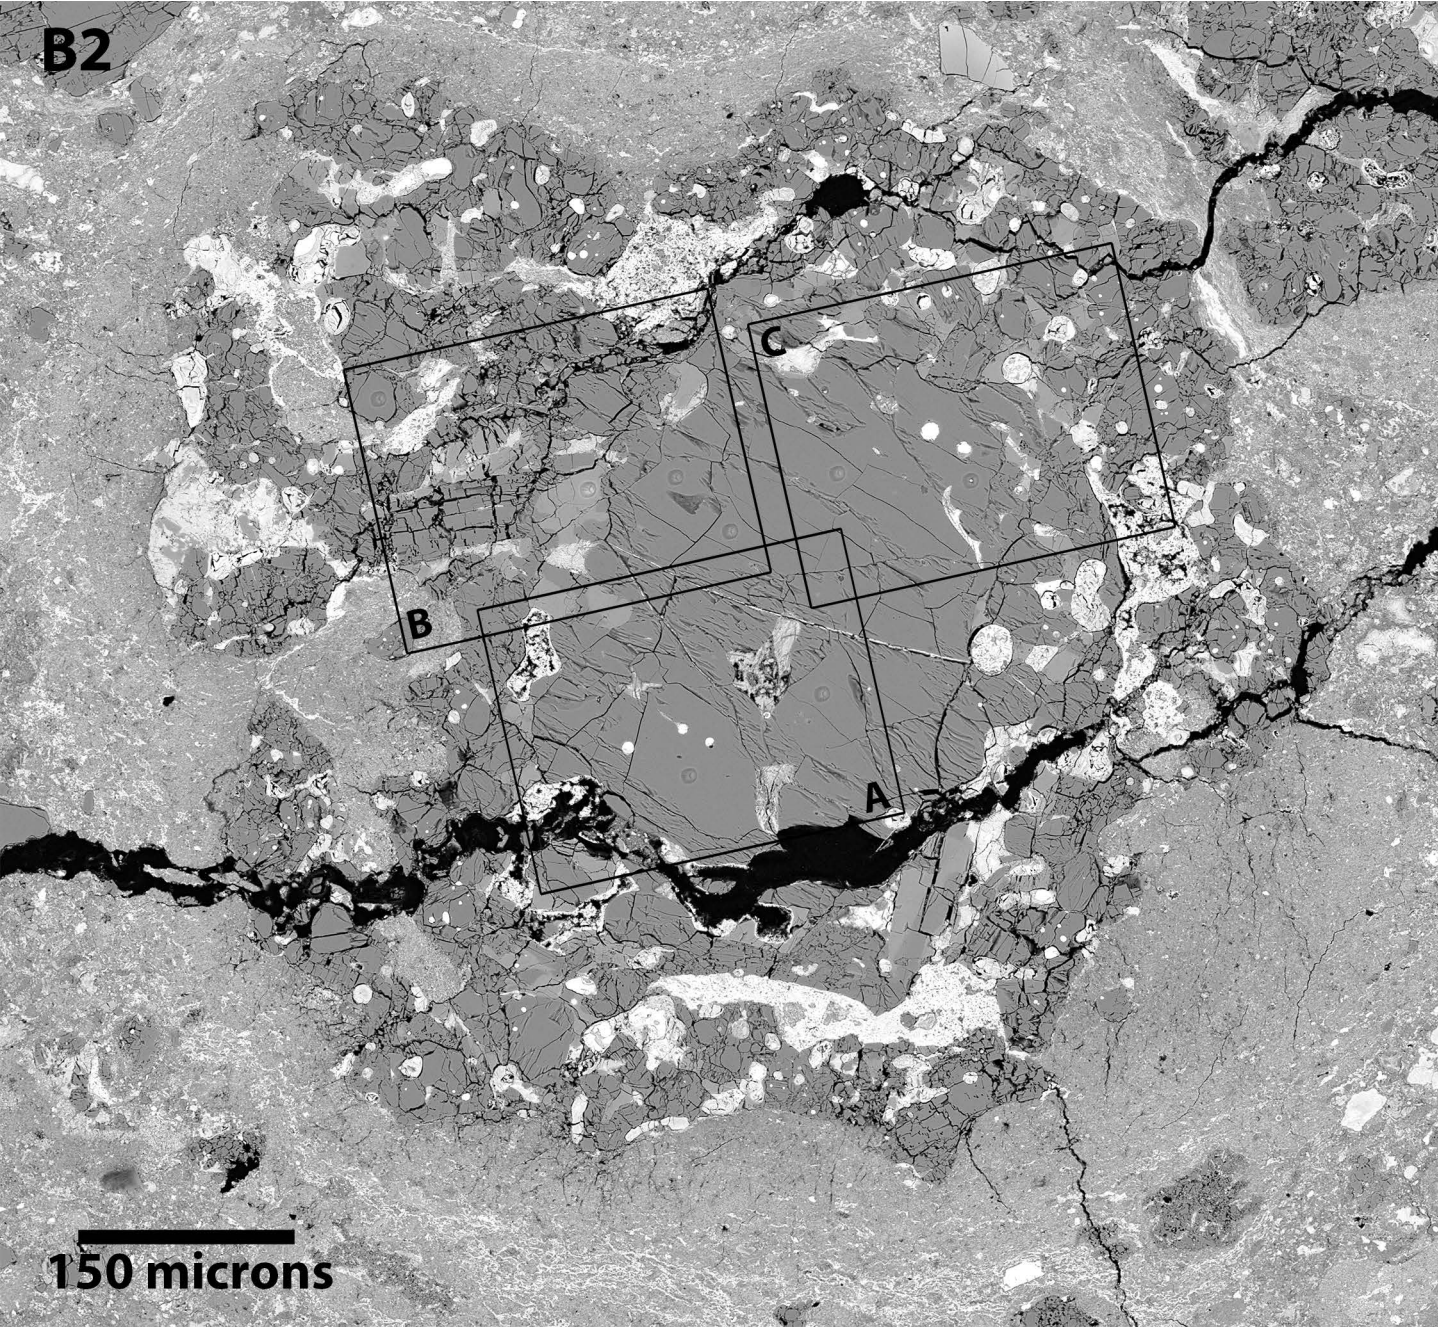

**150 microns**

B2-A

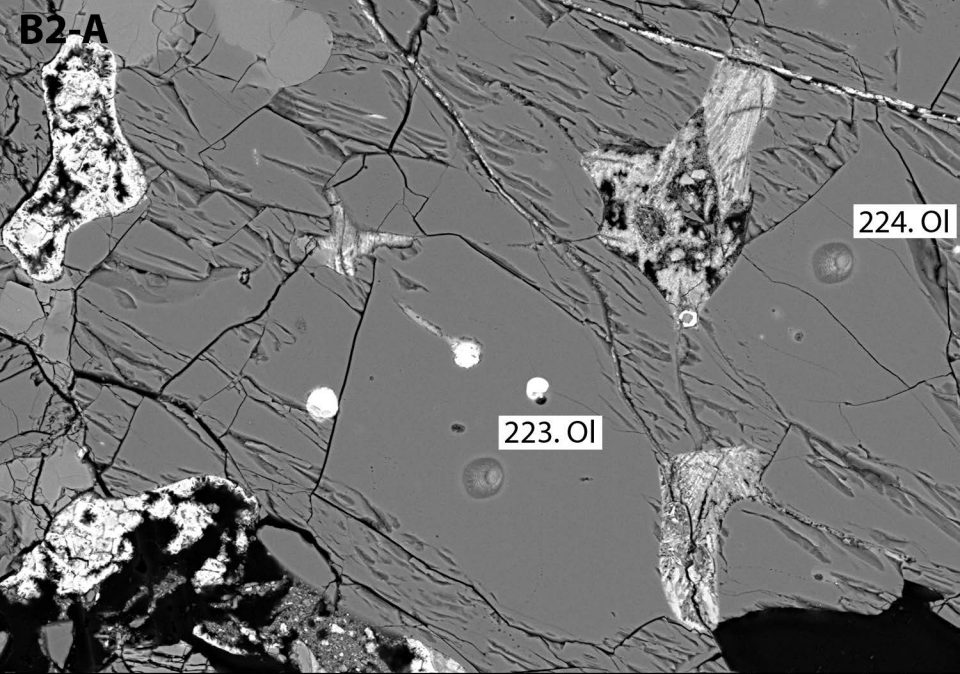

224.OI

223.OI

15.0kV x500 BSECOMP

100um

**B2-B**

228. OI

225. HPx

227. OI

226. OI

15.0kV x450 BSECOMP

100um

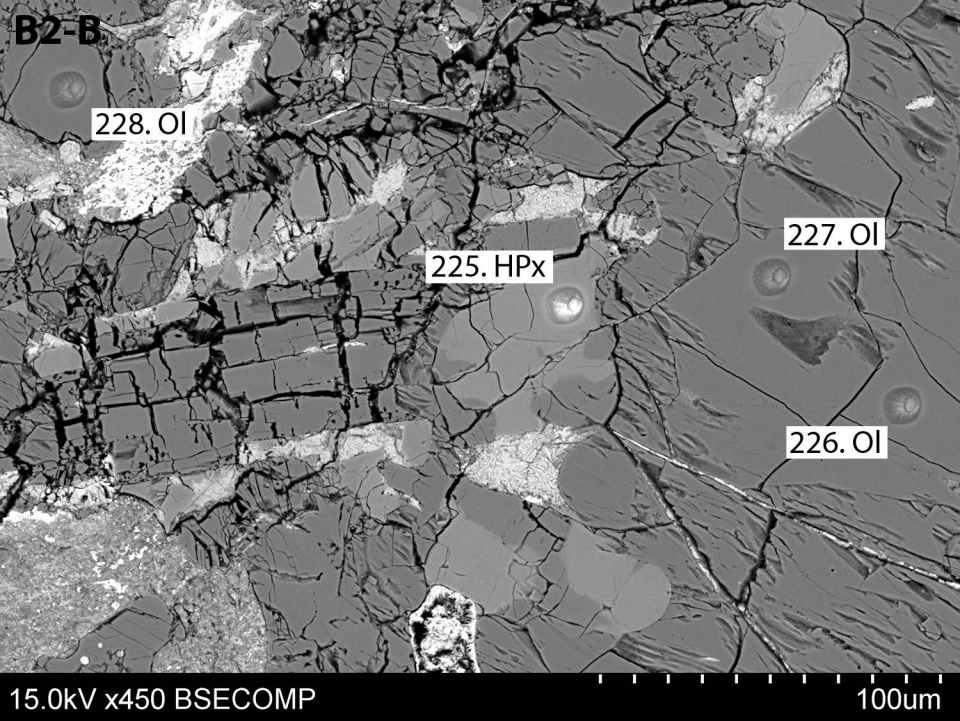

B2-C

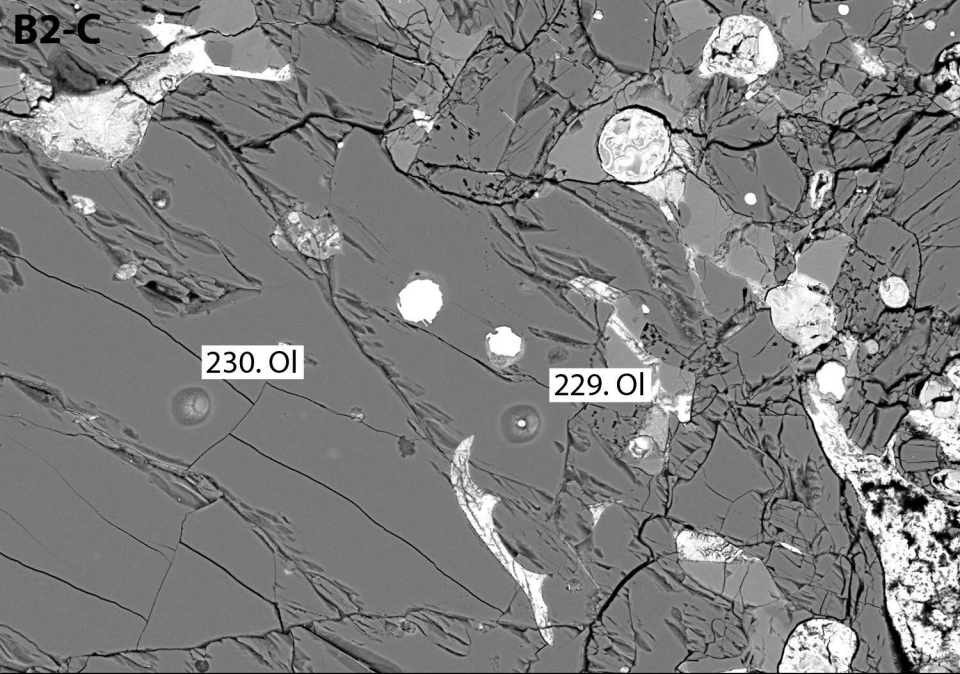

230. OI

229. OI

15.0kV x470 BSECOMP

100um

**B1**

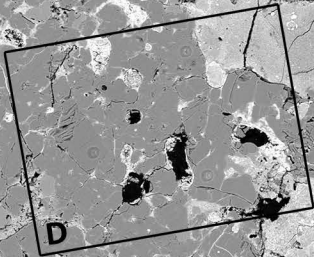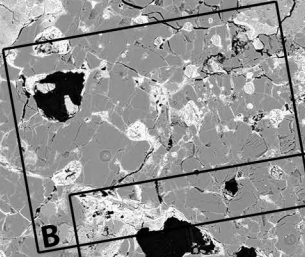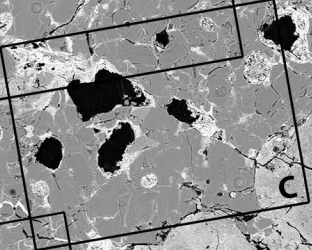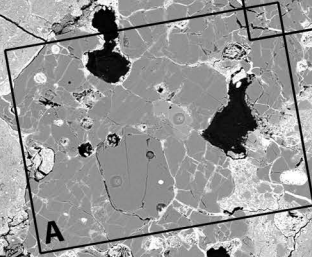

**200 microns**



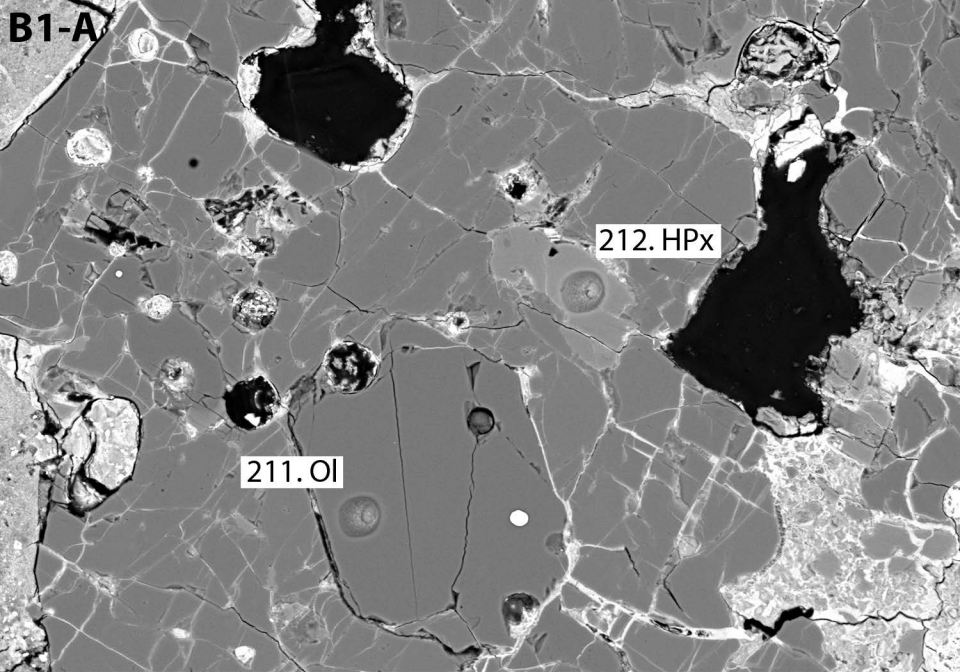

15.0kV x500 BSECOMP

100um

**B1-B**

213.LPx

15.0kV x500 BSECOMP

100um

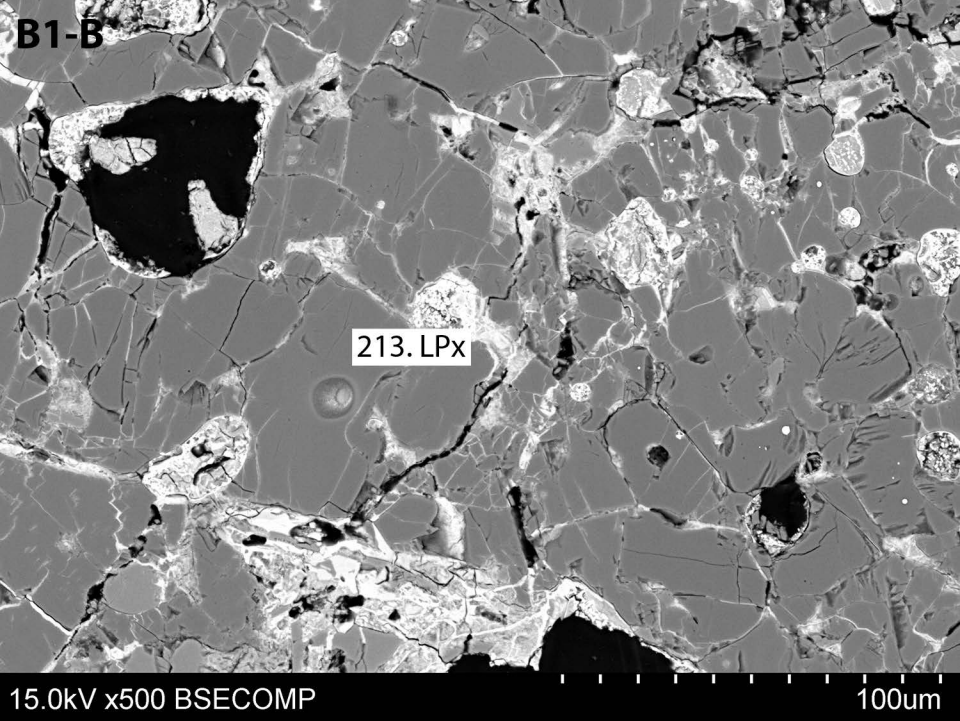

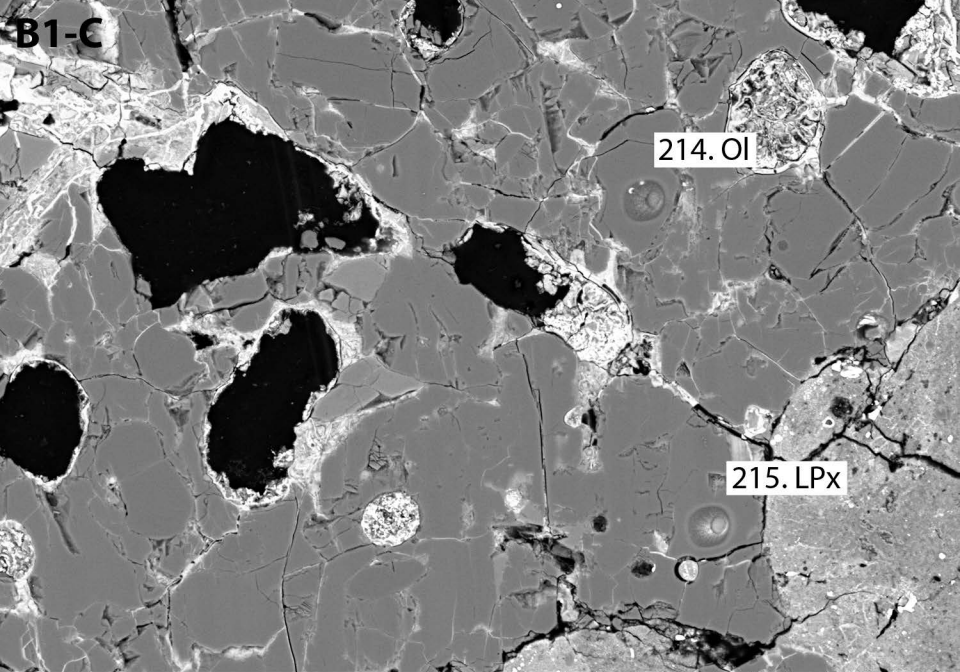

15.0kV x500 BSECOMP

100um

**B1-D**

216. LPx

217. OI

218. LPx

15.0kV x500 BSECOMP

100um

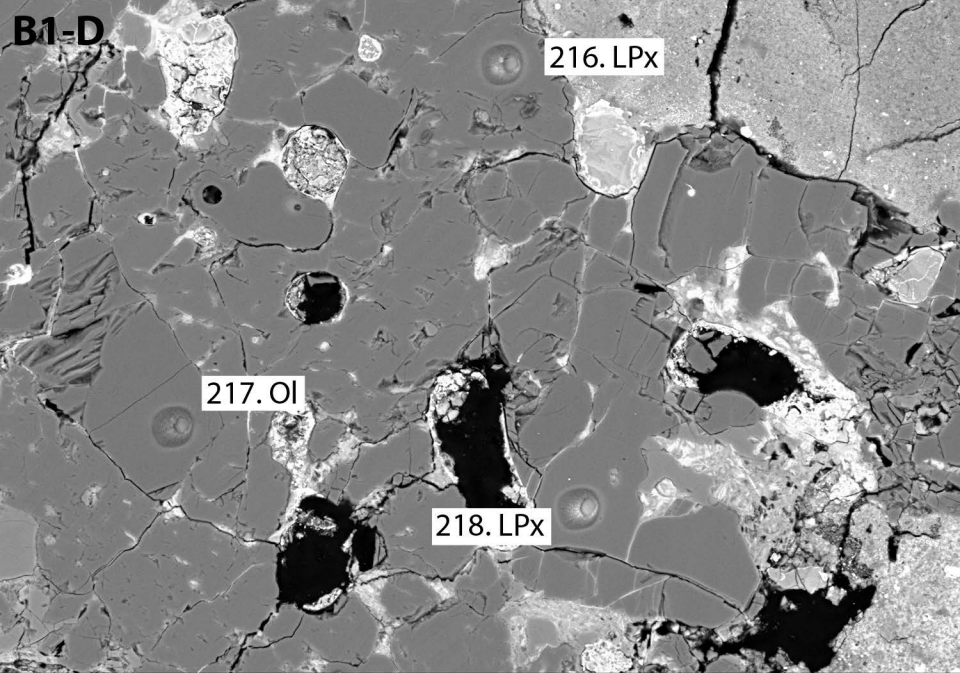

**B7**

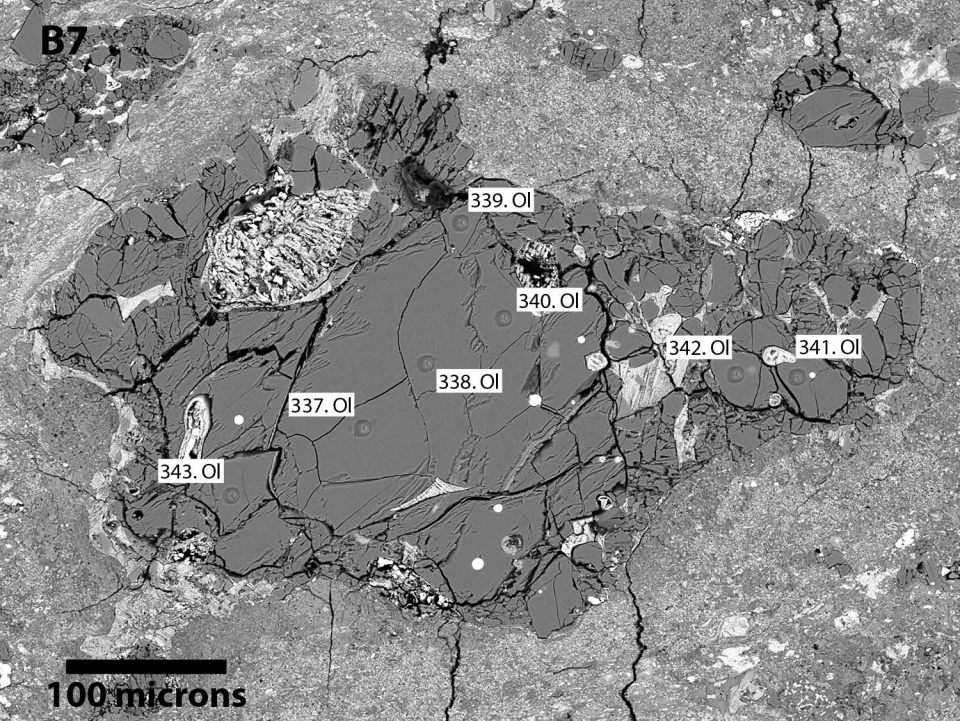

339.OI

340.OI

342.OI

341.OI

338.OI

337.OI

343.OI

100 microns

**A1**

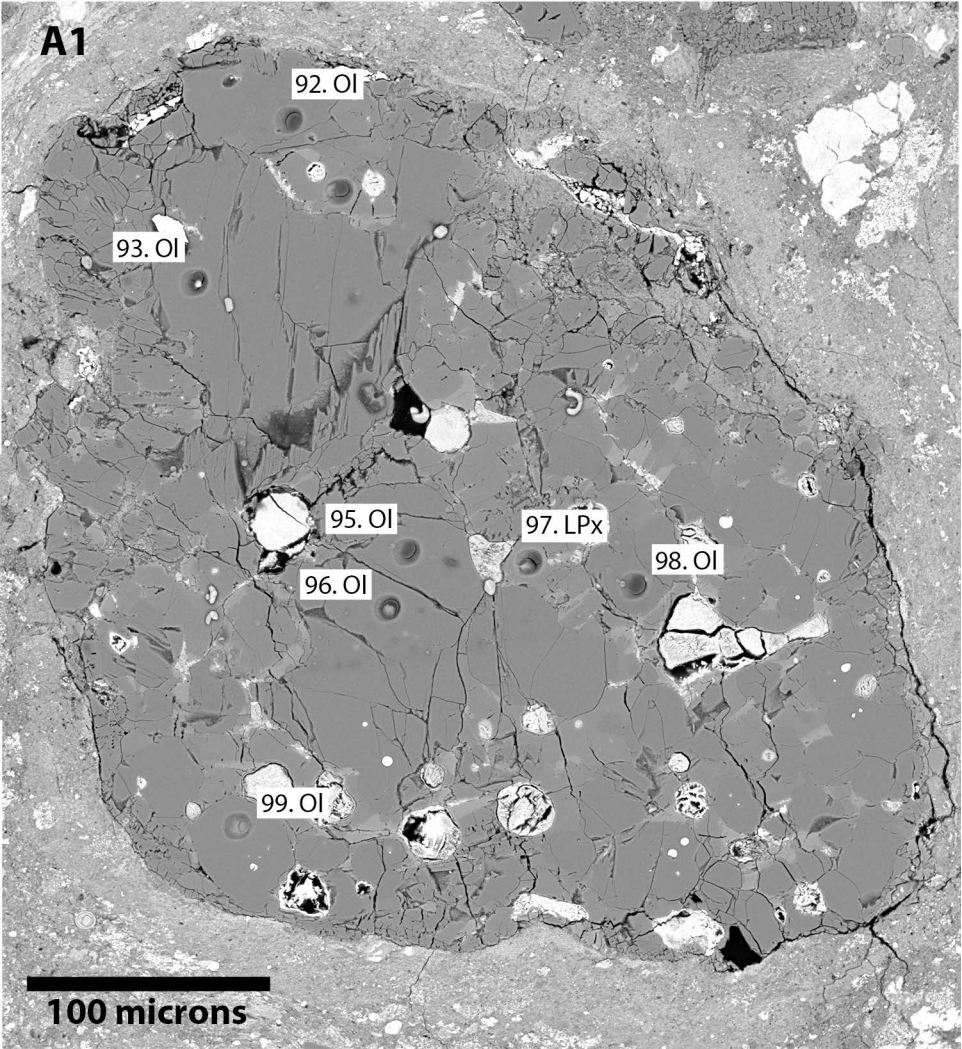

92.OI

93.OI

95.OI

97.LPx

98.OI

96.OI

99.OI

**100 microns**

**A6**

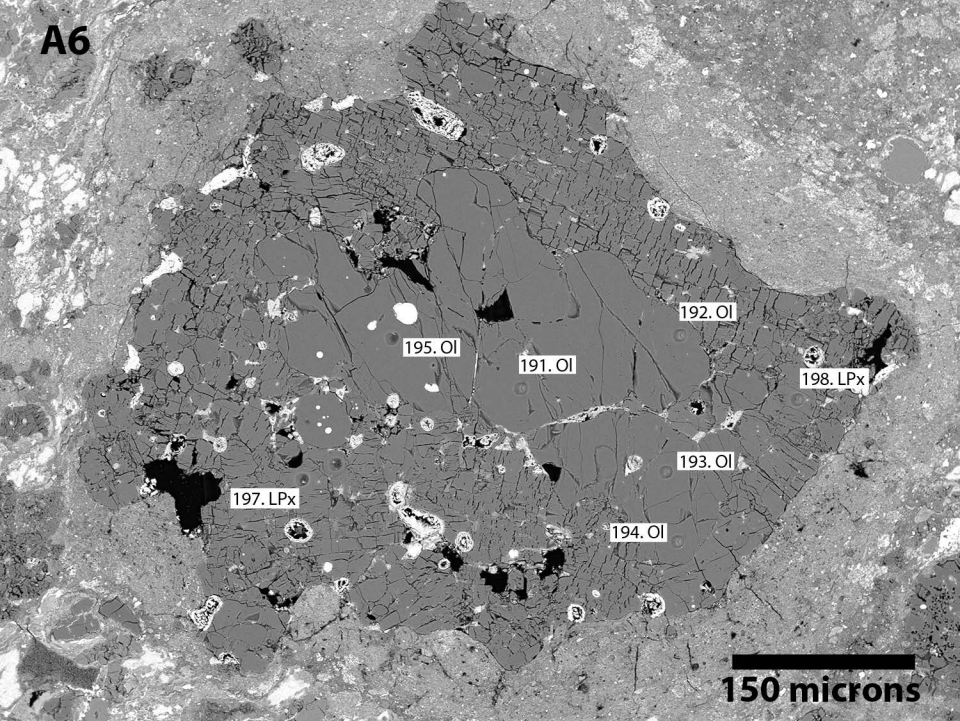

195.OI

191.OI

192.OI

198.LPx

193.OI

197.LPx

194.OI

**150 microns**

C8

344. LPx

345. OI

347. LPx

346. OI

348. LPx

351. OI

349. OI

350. LPx

100 microns

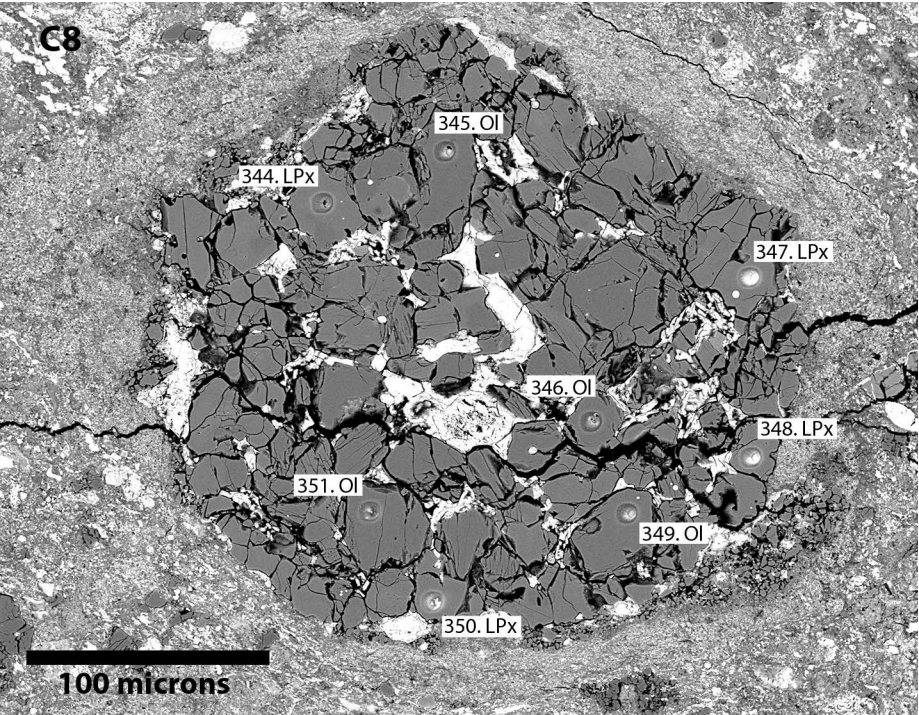



C11

372. OI

371. OI

364. OI

367. OI

370. OI

365. OI

366. OI

368. OI

369. OI

100 microns

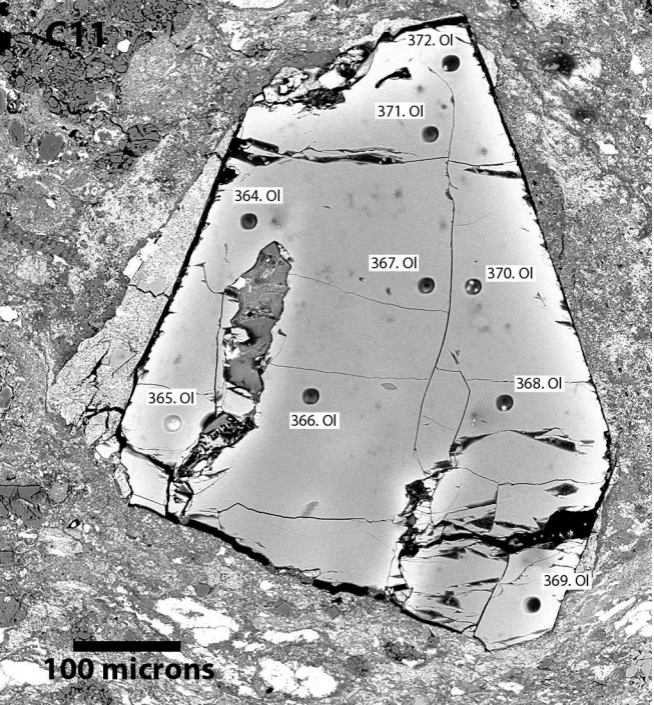

**B9**

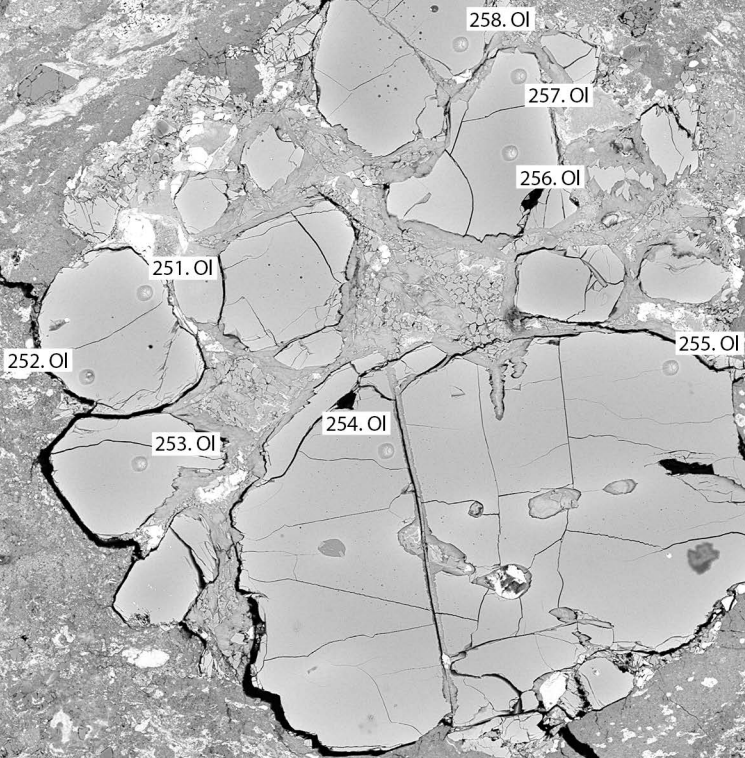

**150 microns**

**B8**

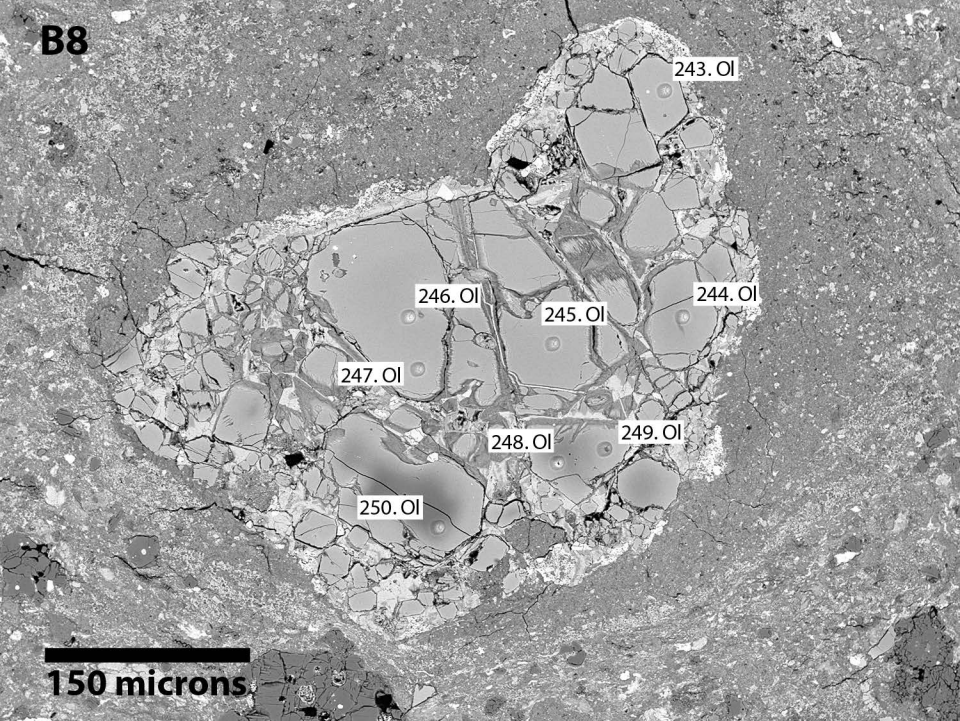

243.OI

246.OI

245.OI

244.OI

247.OI

248.OI

249.OI

250.OI

150 microns

**Homogeneous chondrules – 10 microns diameter spots**

**B6**

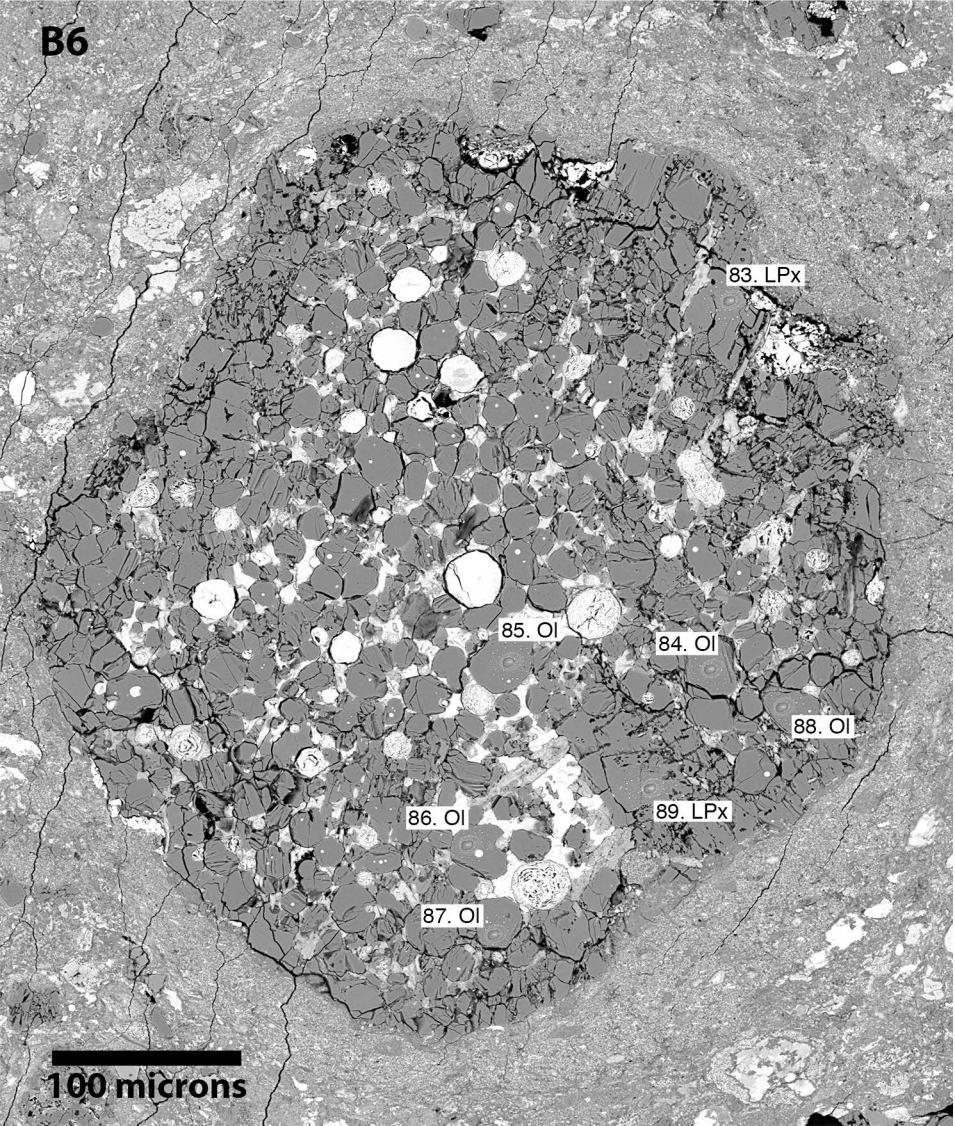

83. LPx

85. OI

84. OI

88. OI

86. OI

89. LPx

87. OI

**100 microns**

**B4**

79. OI

80. OI

78. OI

76. OI

75. OI

81. OI

77. OI

82. OI

**150 microns**

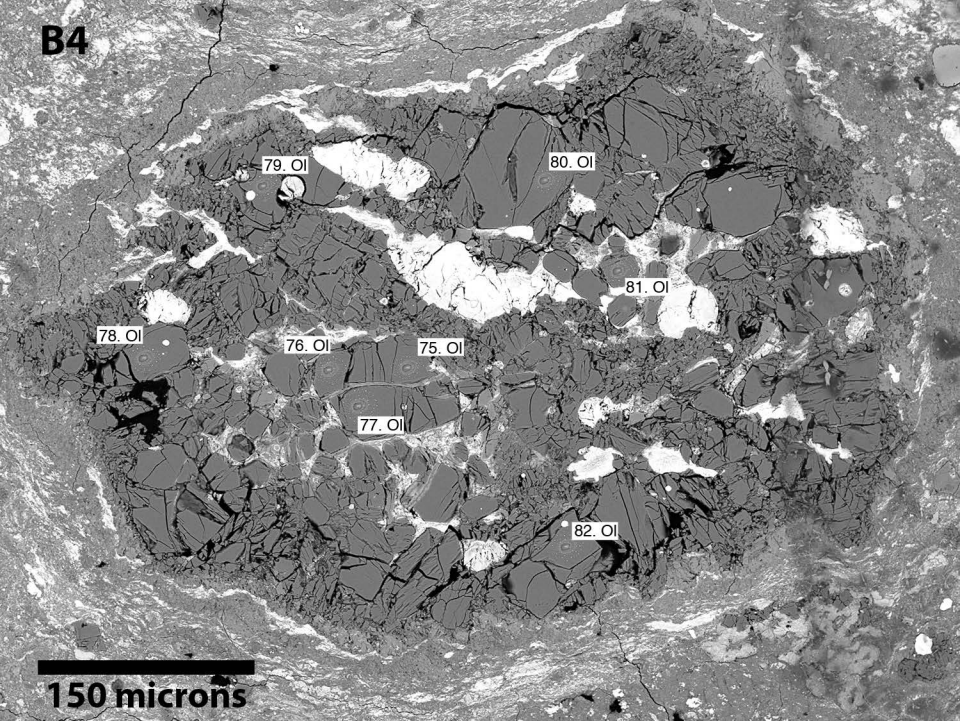

C5

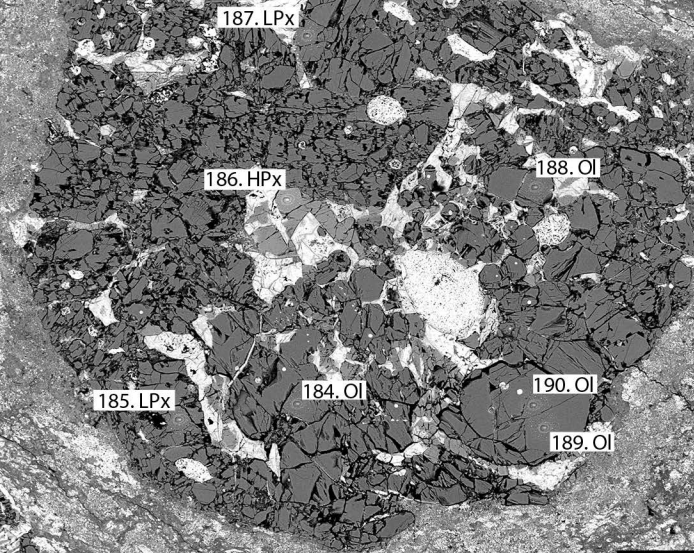

100 microns

**C3**

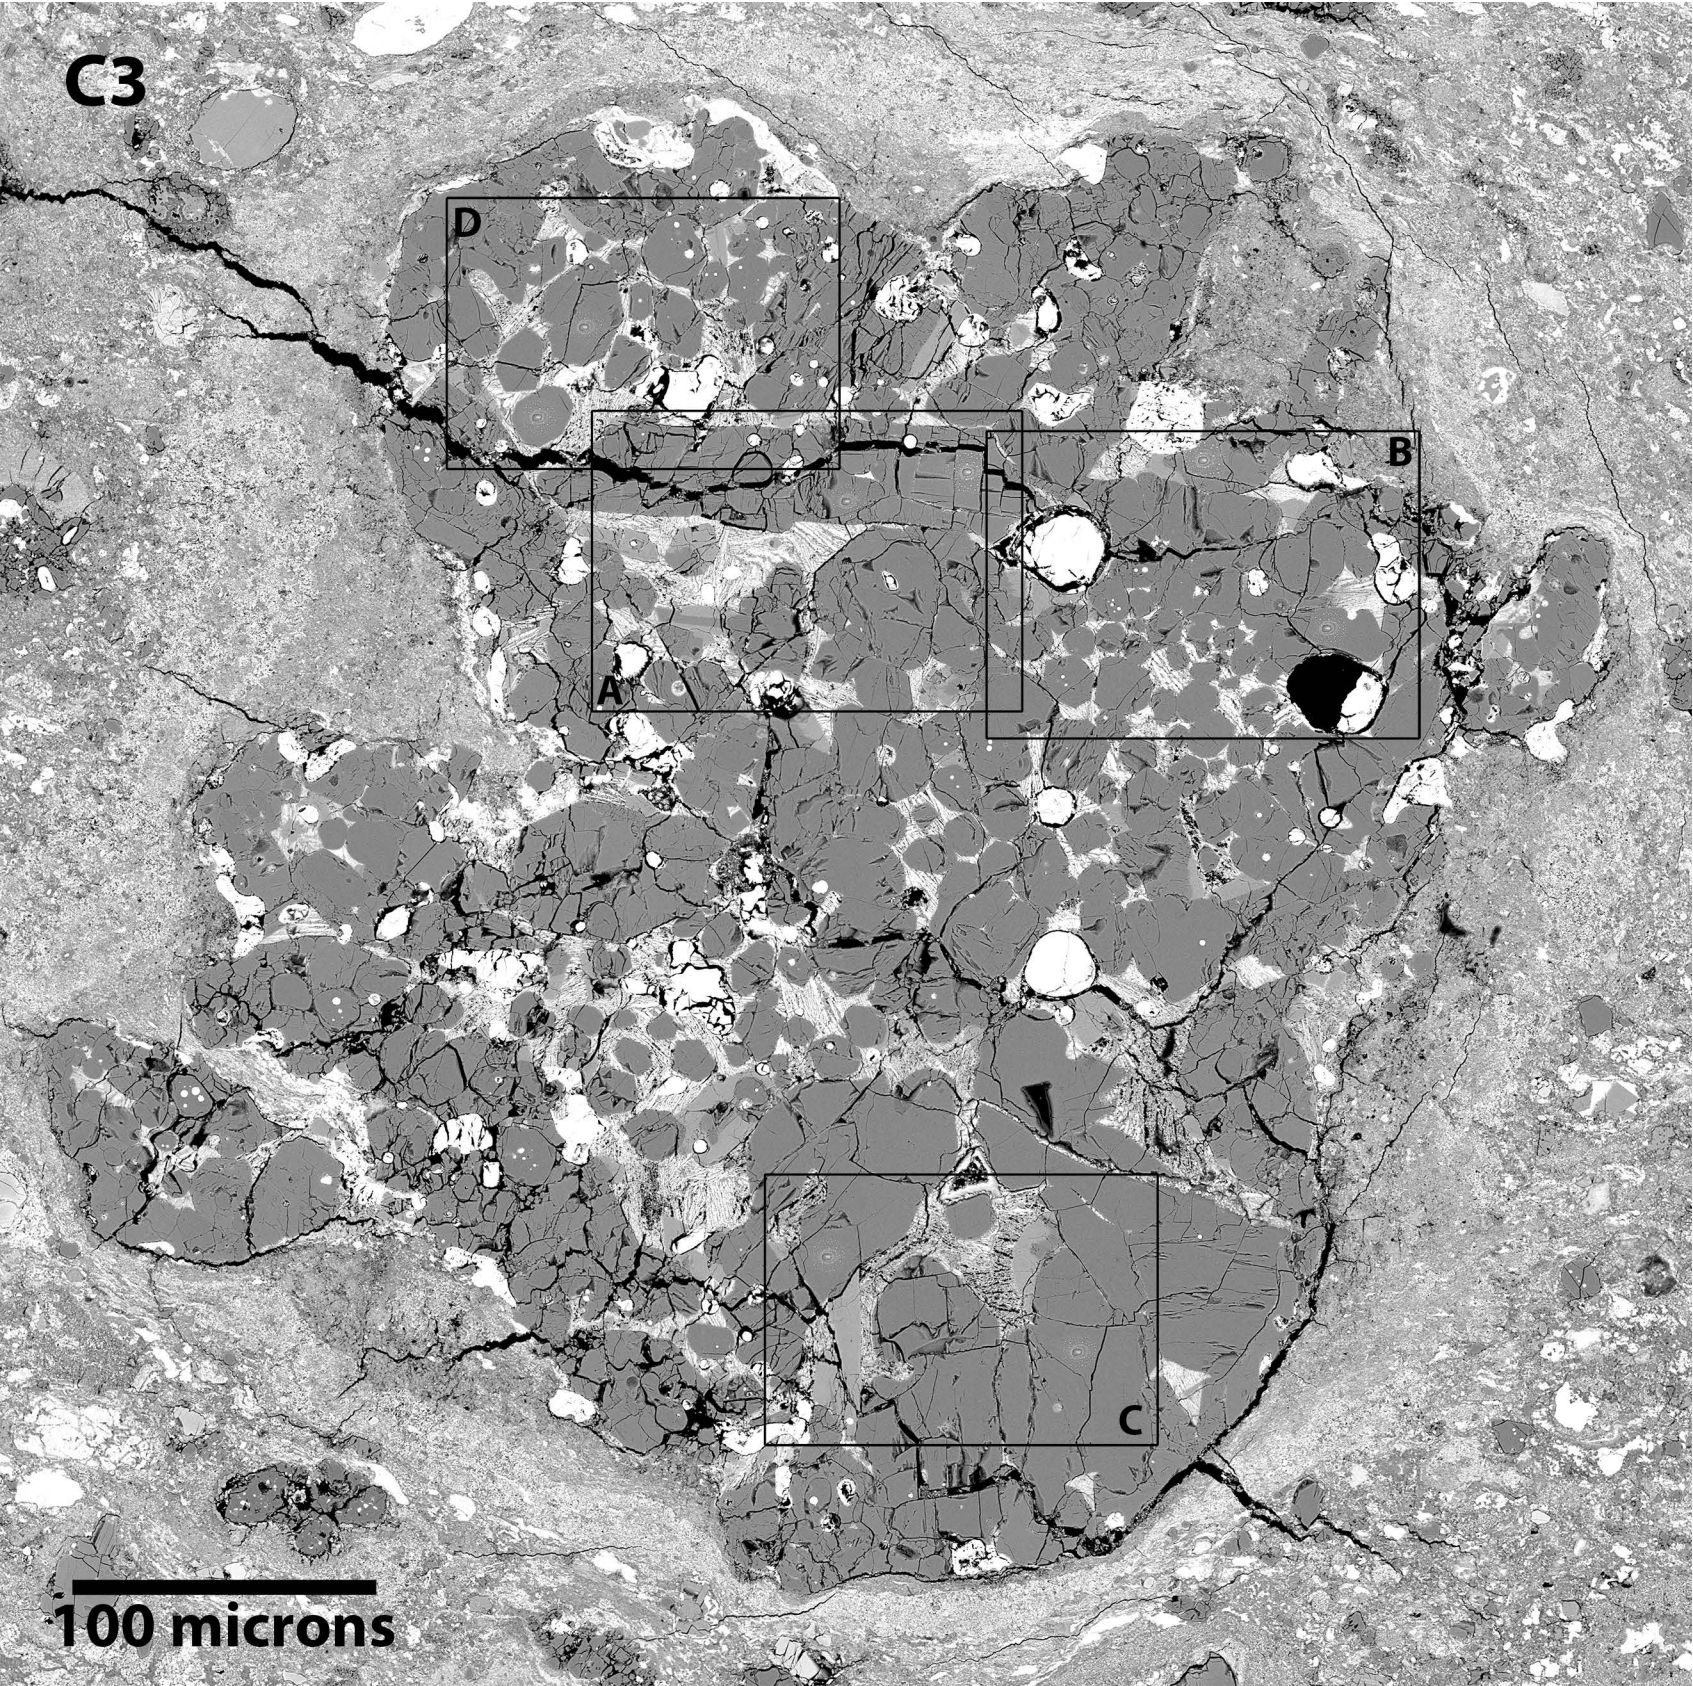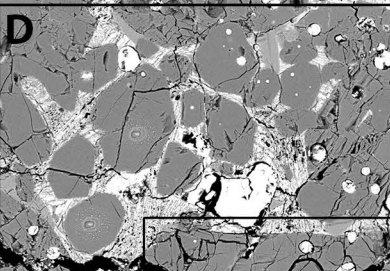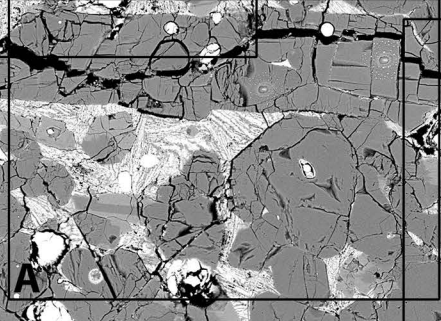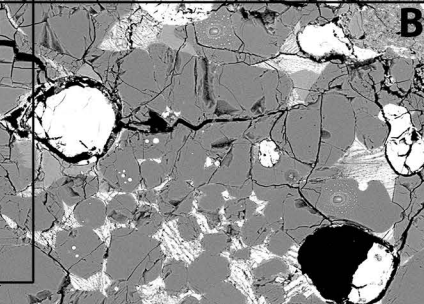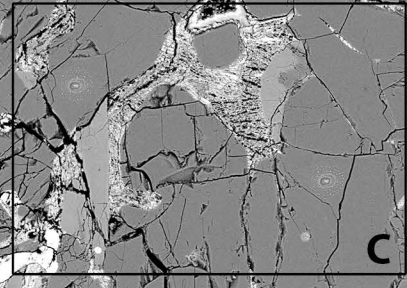

**100 microns**



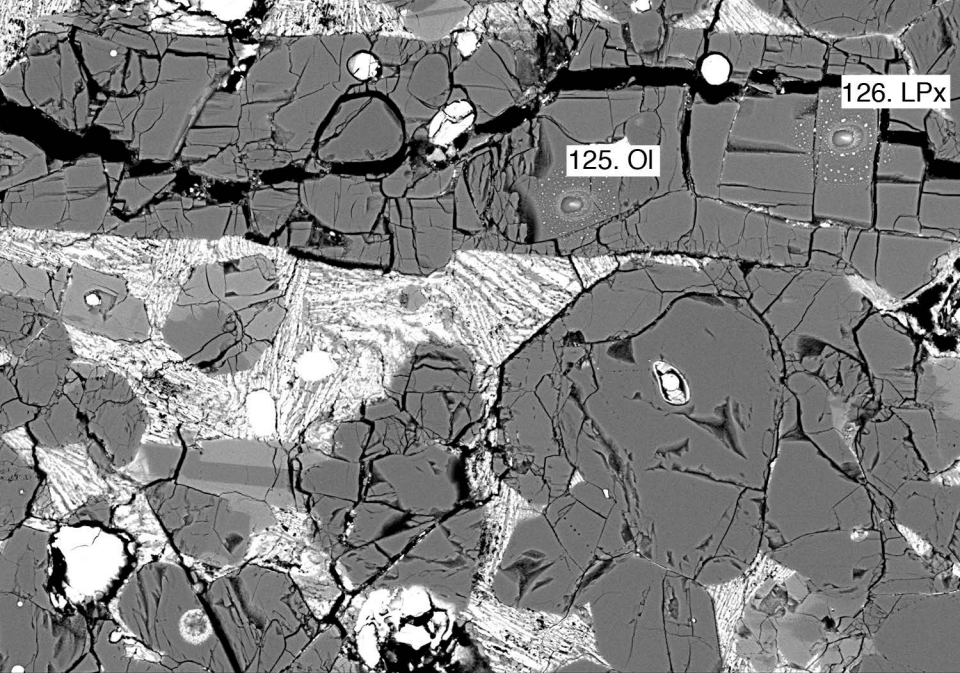

126. LPx

125. OI

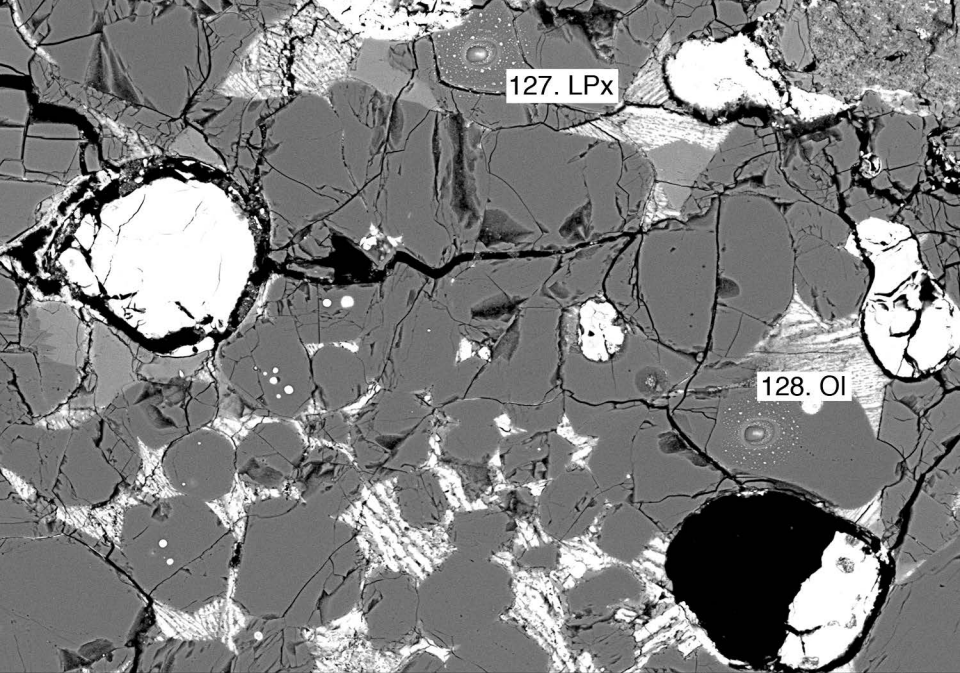

127. LPx

128. OI

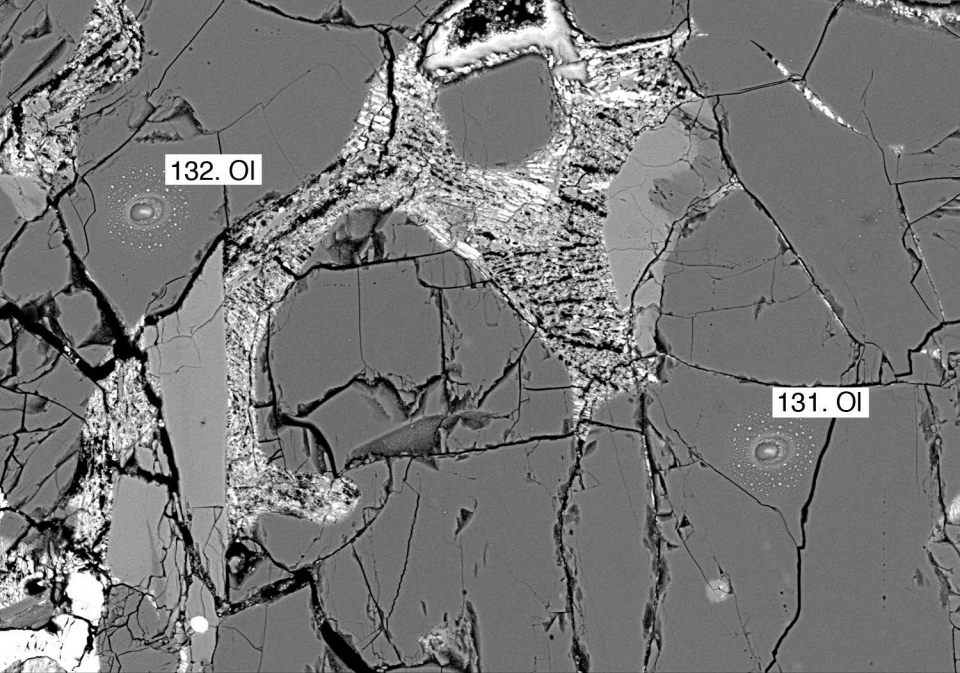

132. OI

131. OI

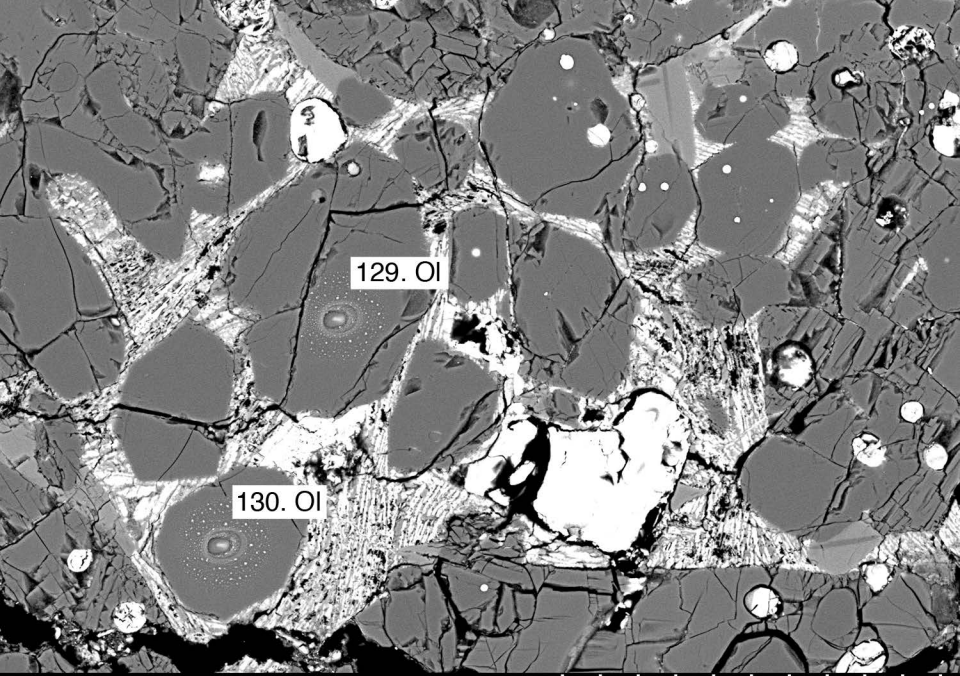

129.OI

130.OI

C1

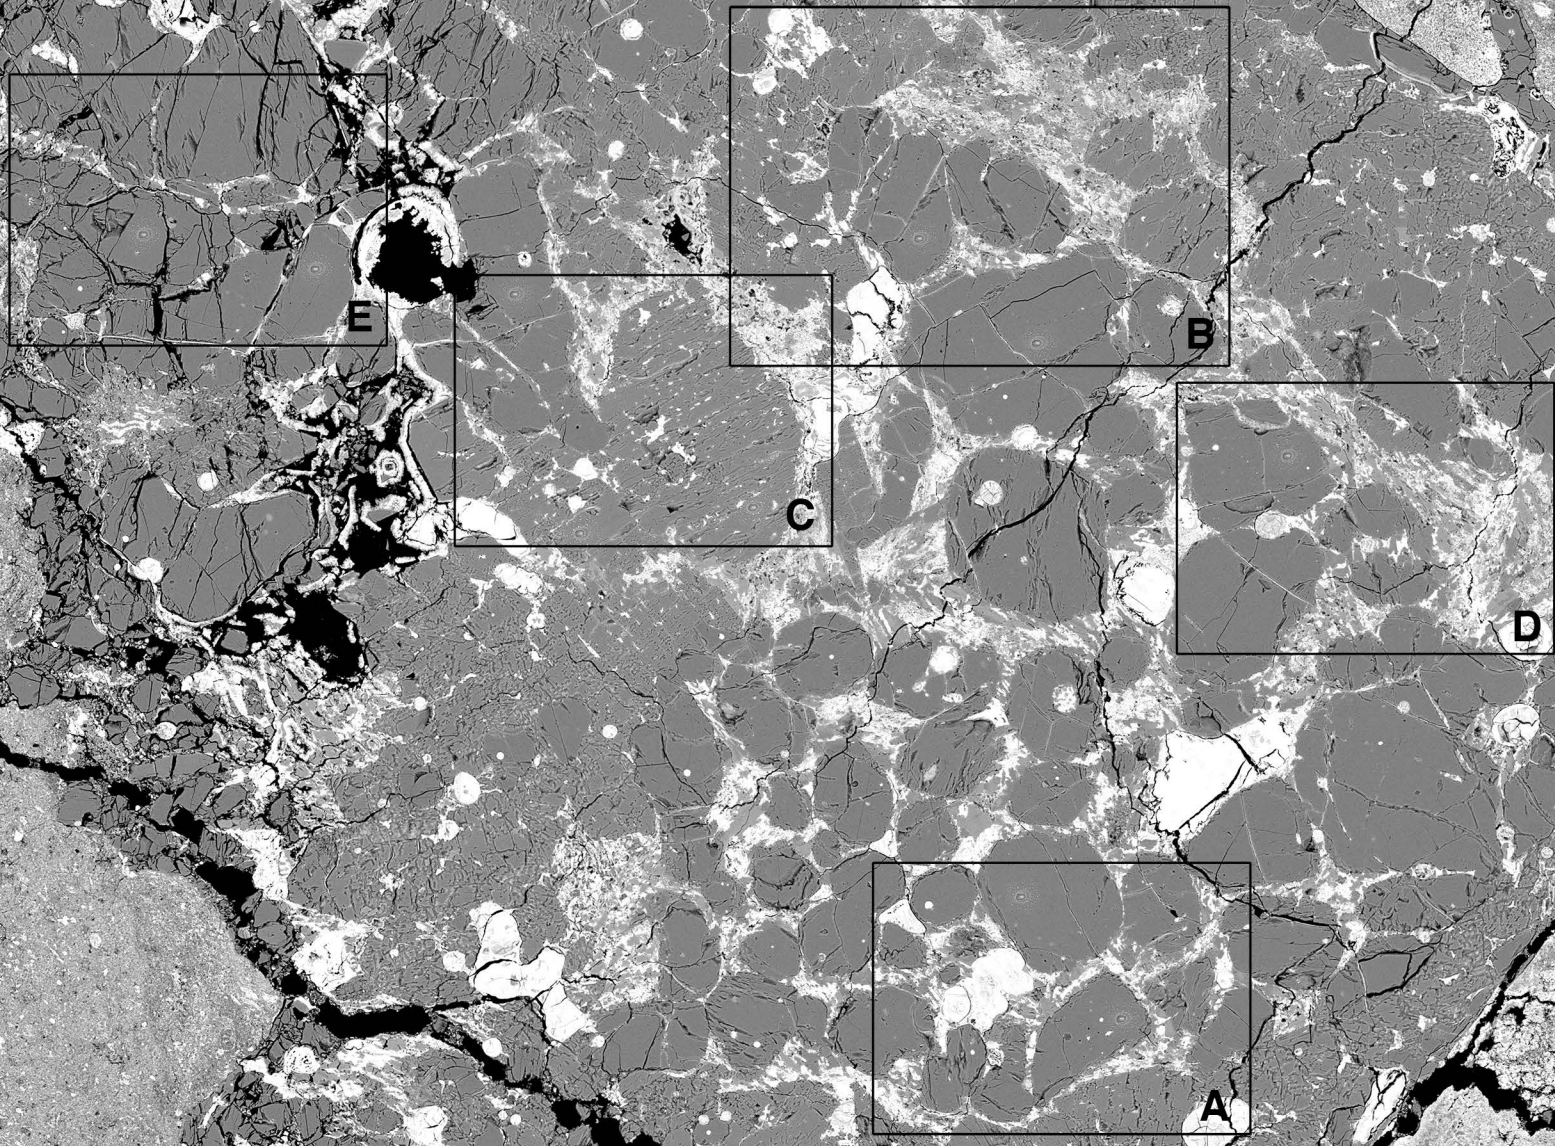

100 microns

C1-A

94. OI

95. OI

15.0kV x470 BSECOMP

100um

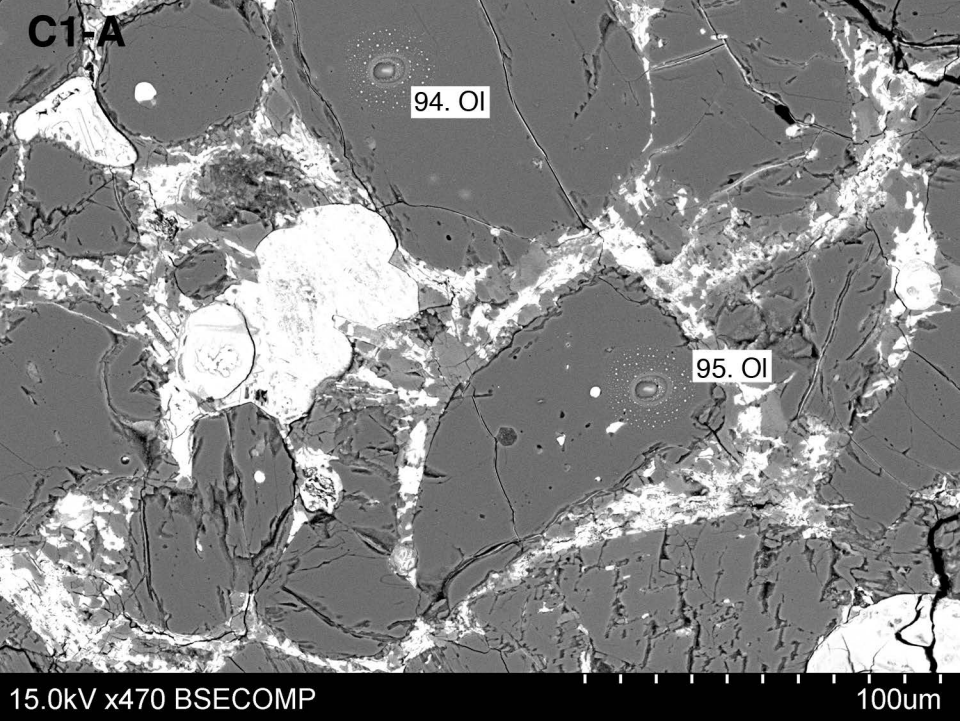

**C1-B**

98. LPx

97. OI

98. OI

15.0kV x350 BSECOMP

100um

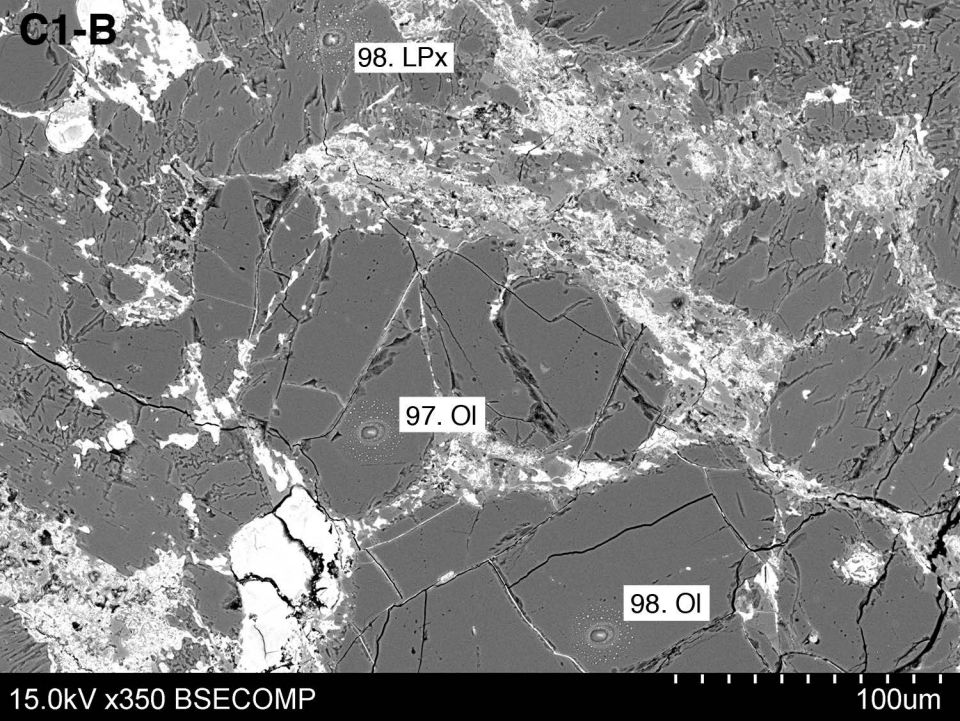

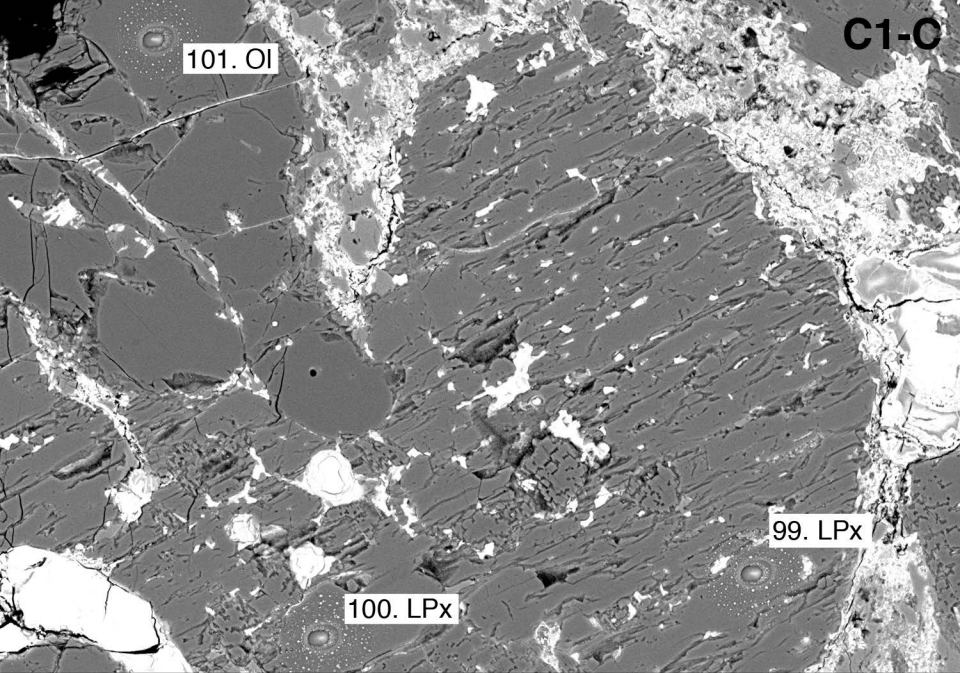

101. OI

C1-O

99. LPx

100. LPx

100um

15.0kV x450 BSECOMP



C1-D

104. OI

15.0kV x450 BSECOMP

100um

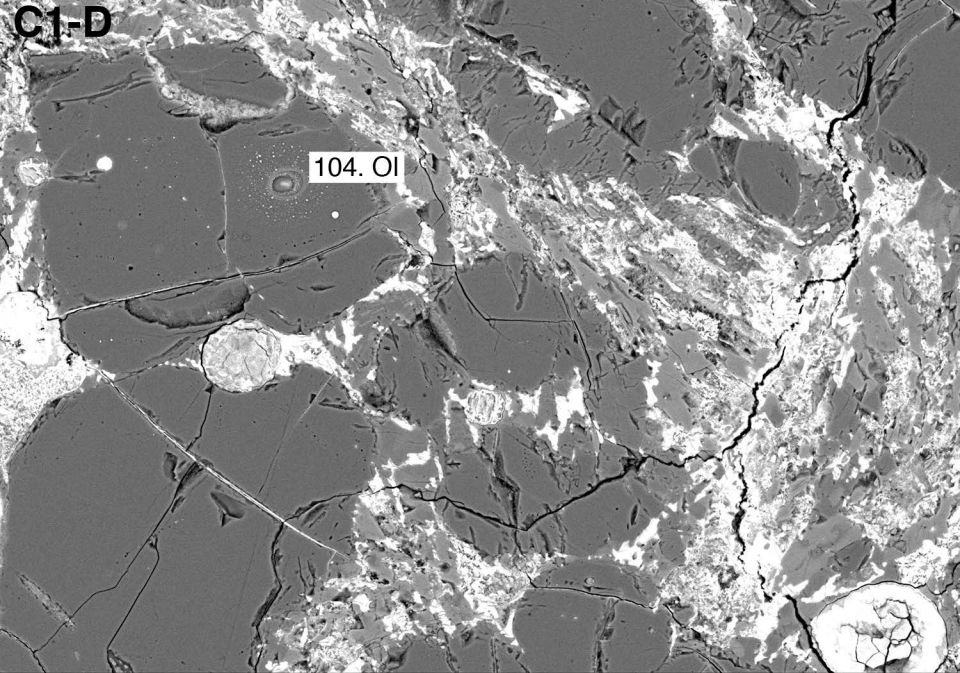

C1-E

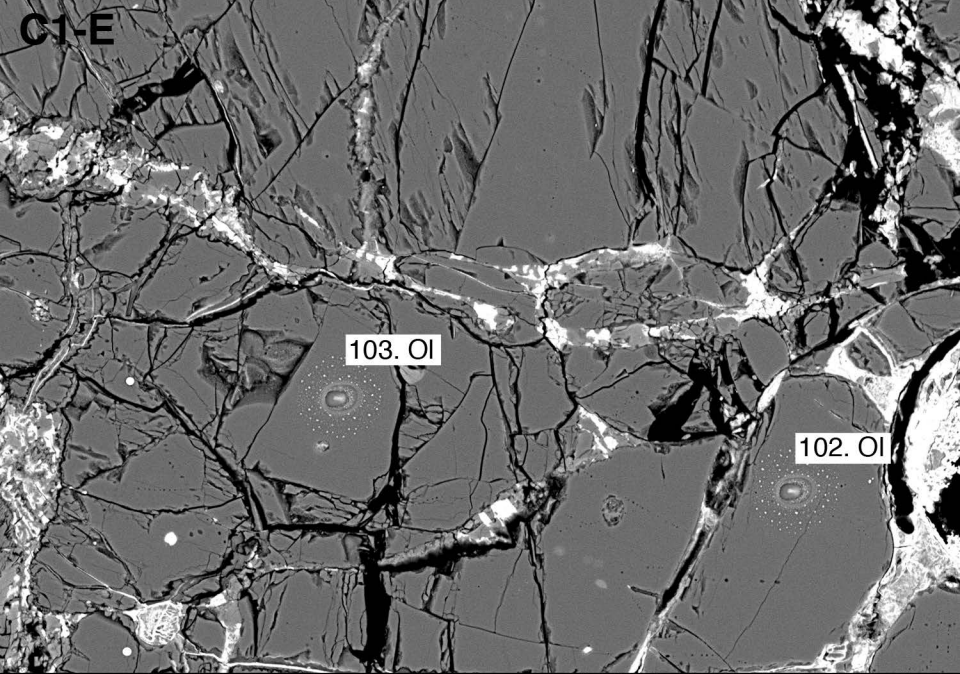

103. OI

102. OI

15.0kV x470 BSECOMP

100um

**C4**

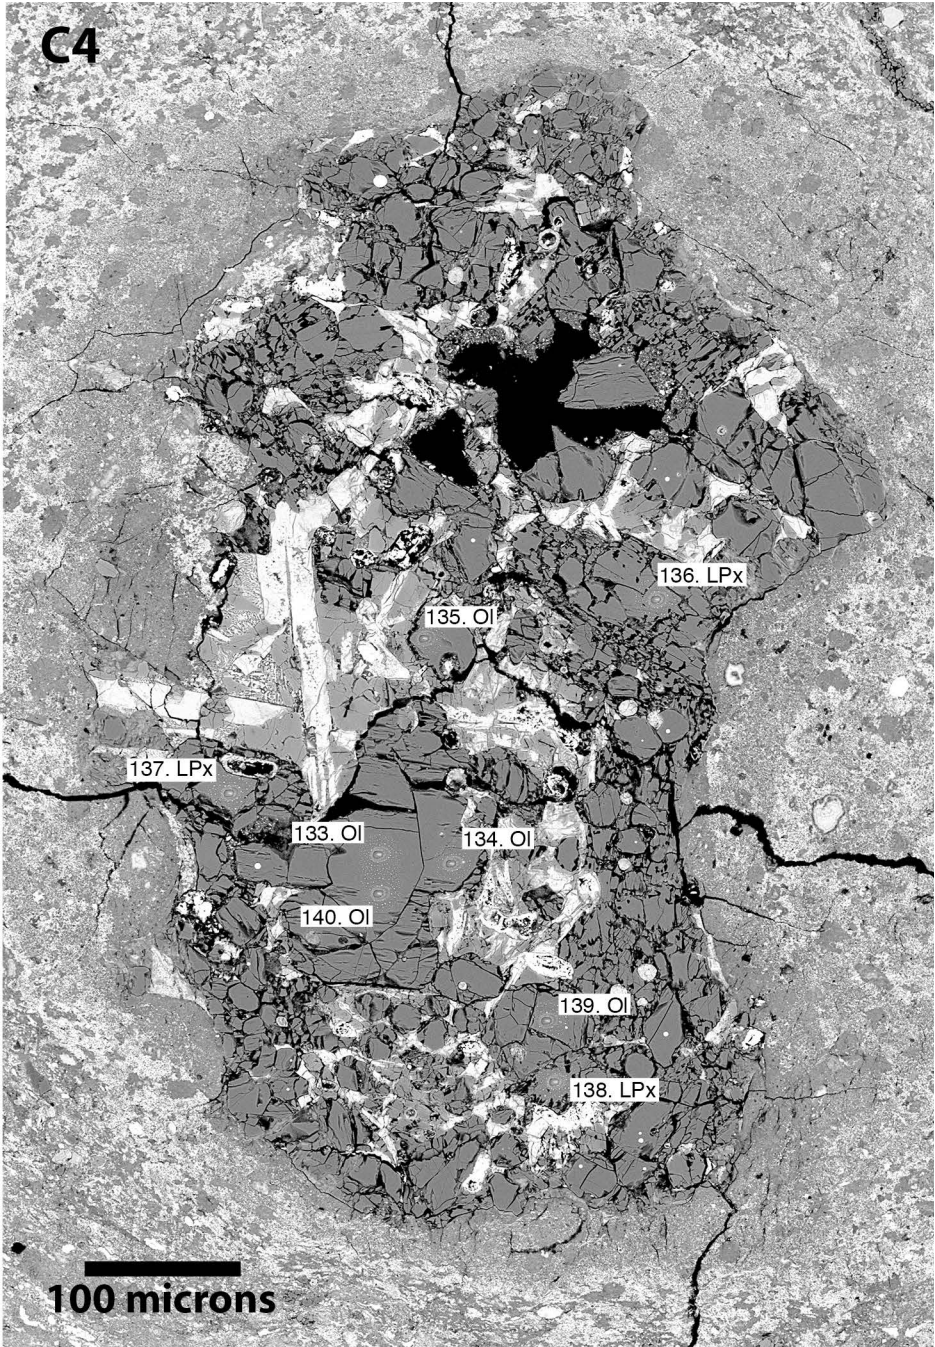

**100 microns**

**A3**

38. OI

35. OI

39. OI

40. LPx

36. OI

37. OI

100 microns

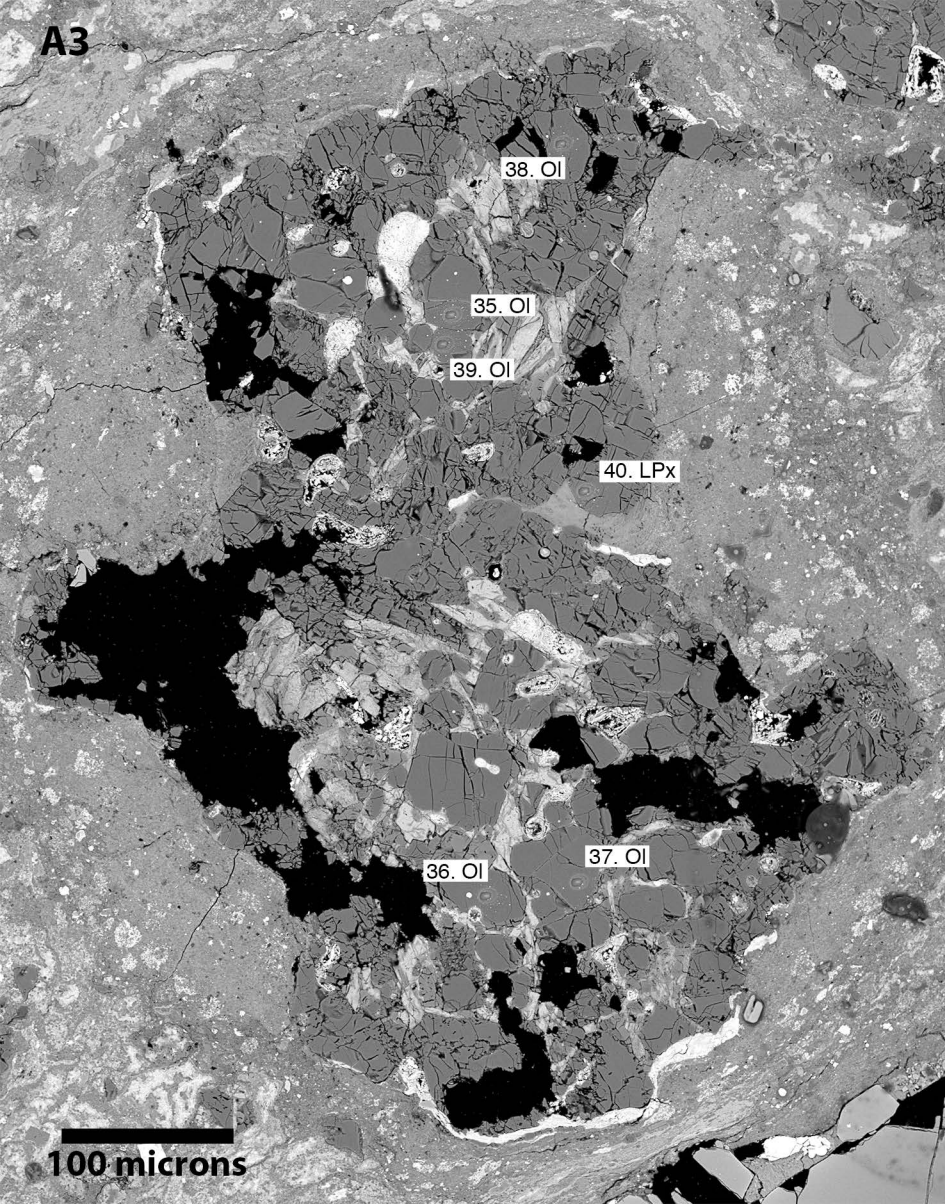

**C7**

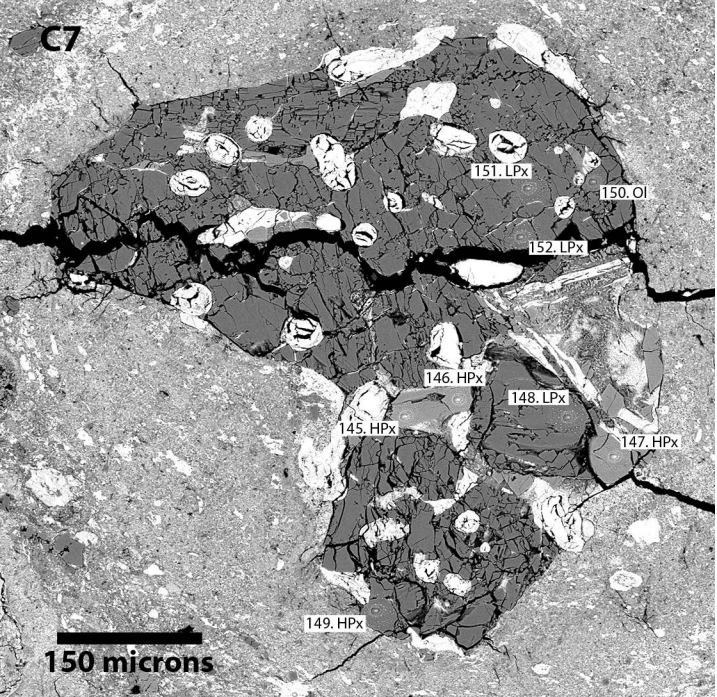

151.LPx

150.OI

152.LPx

146.HPx

148.LPx

147.HPx

145.HPx

149.HPx

**150 microns**

C12

167.OI

166.OI

165.OI

168.OI

169.OI

170.OI

172.OI

171.OI

100 microns

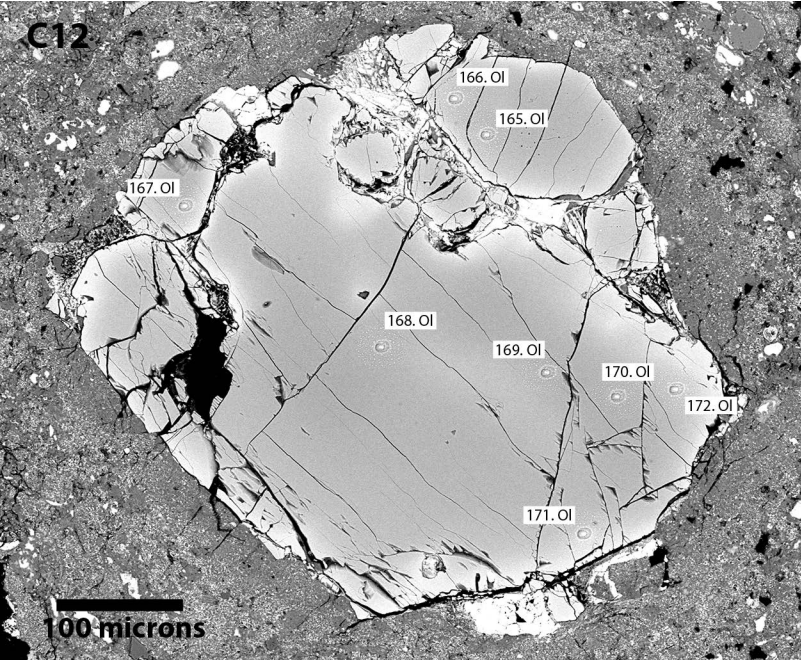

C6

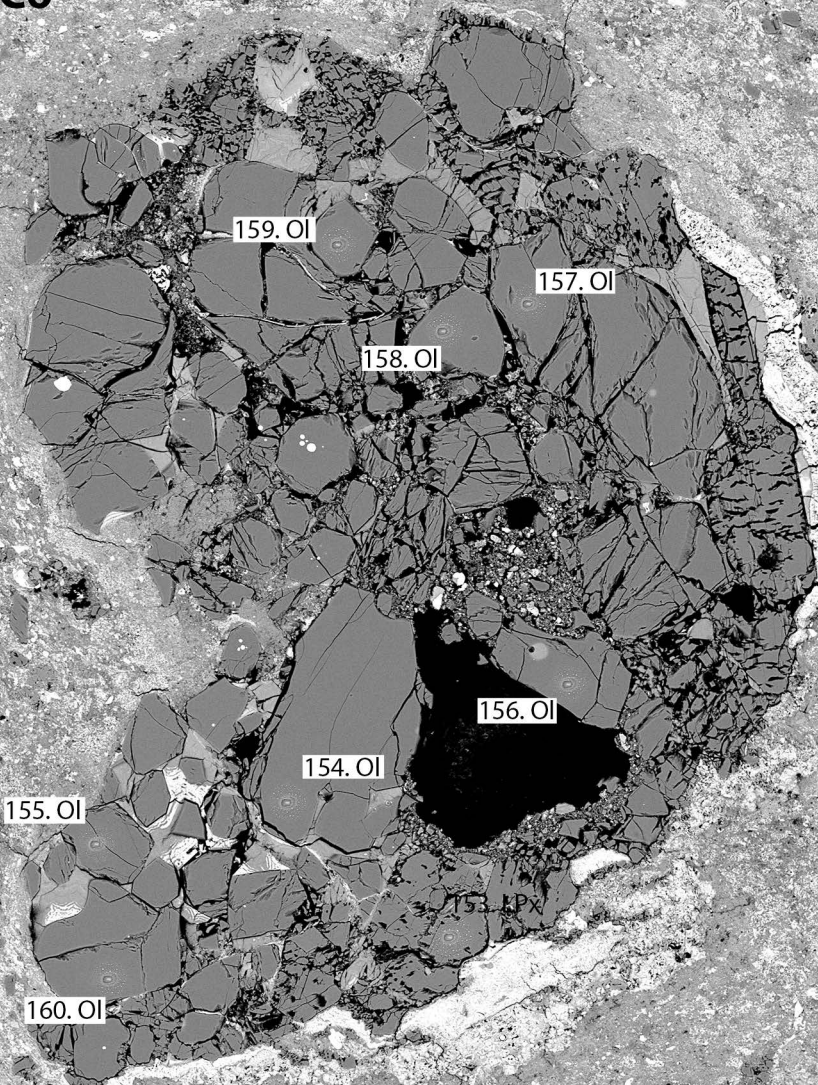

100 microns

**Heterogeneous chondrules – 15 microns diameter spots**



**A7**

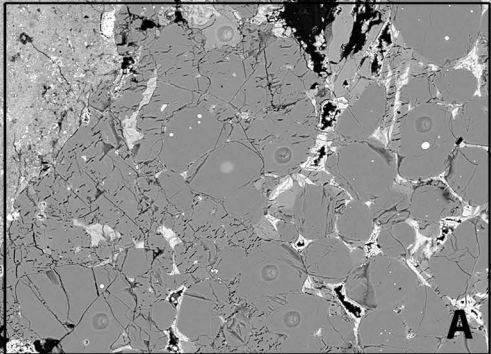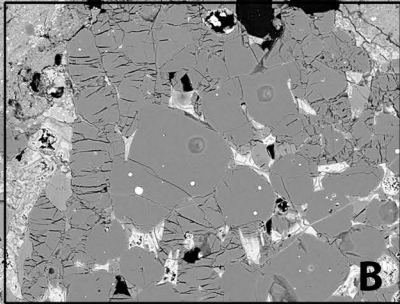

**200 microns**

A7-A

208. HPx

206. OI

207. LPx

204. OI

203. OI

205. OI

15.0kV x400 BSECOMP

100um

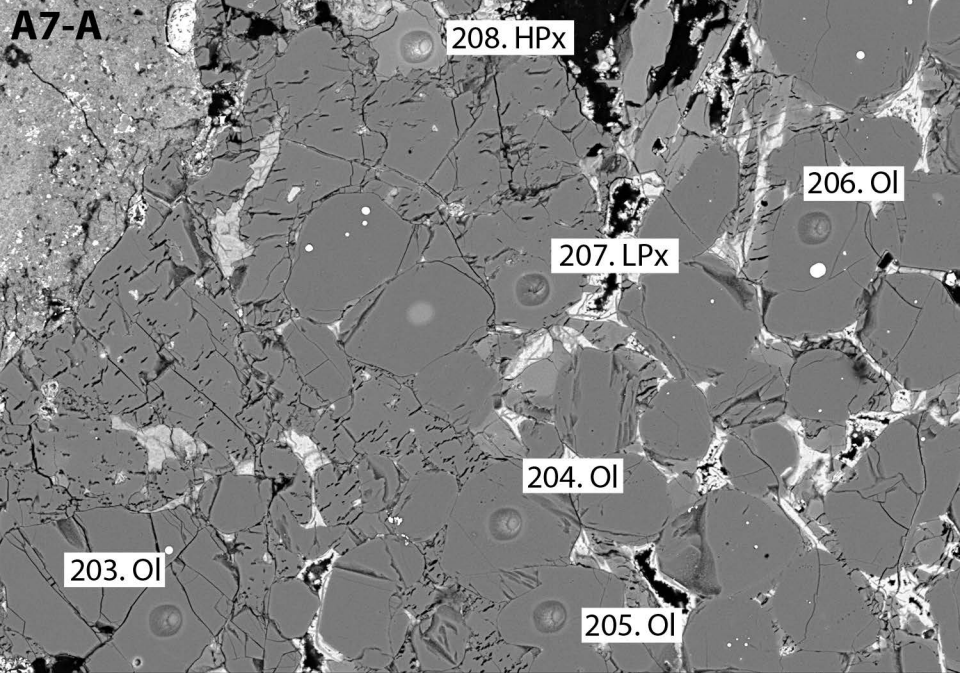

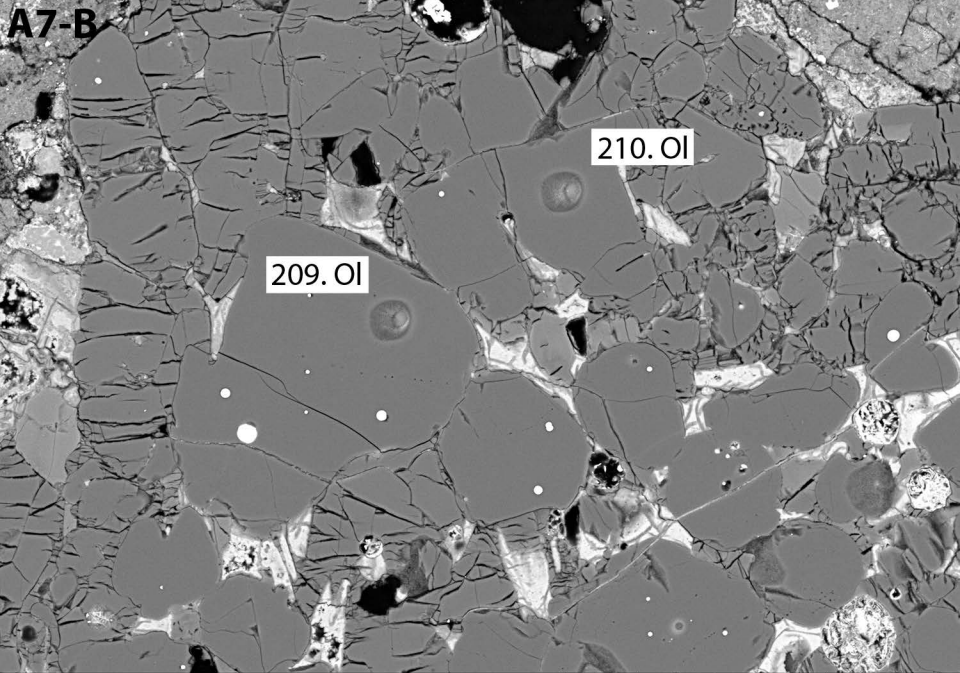

15.0kV x500 BSECOMP

100um

**Heterogeneous chondrules – 10 microns diameter spots**

**B3**

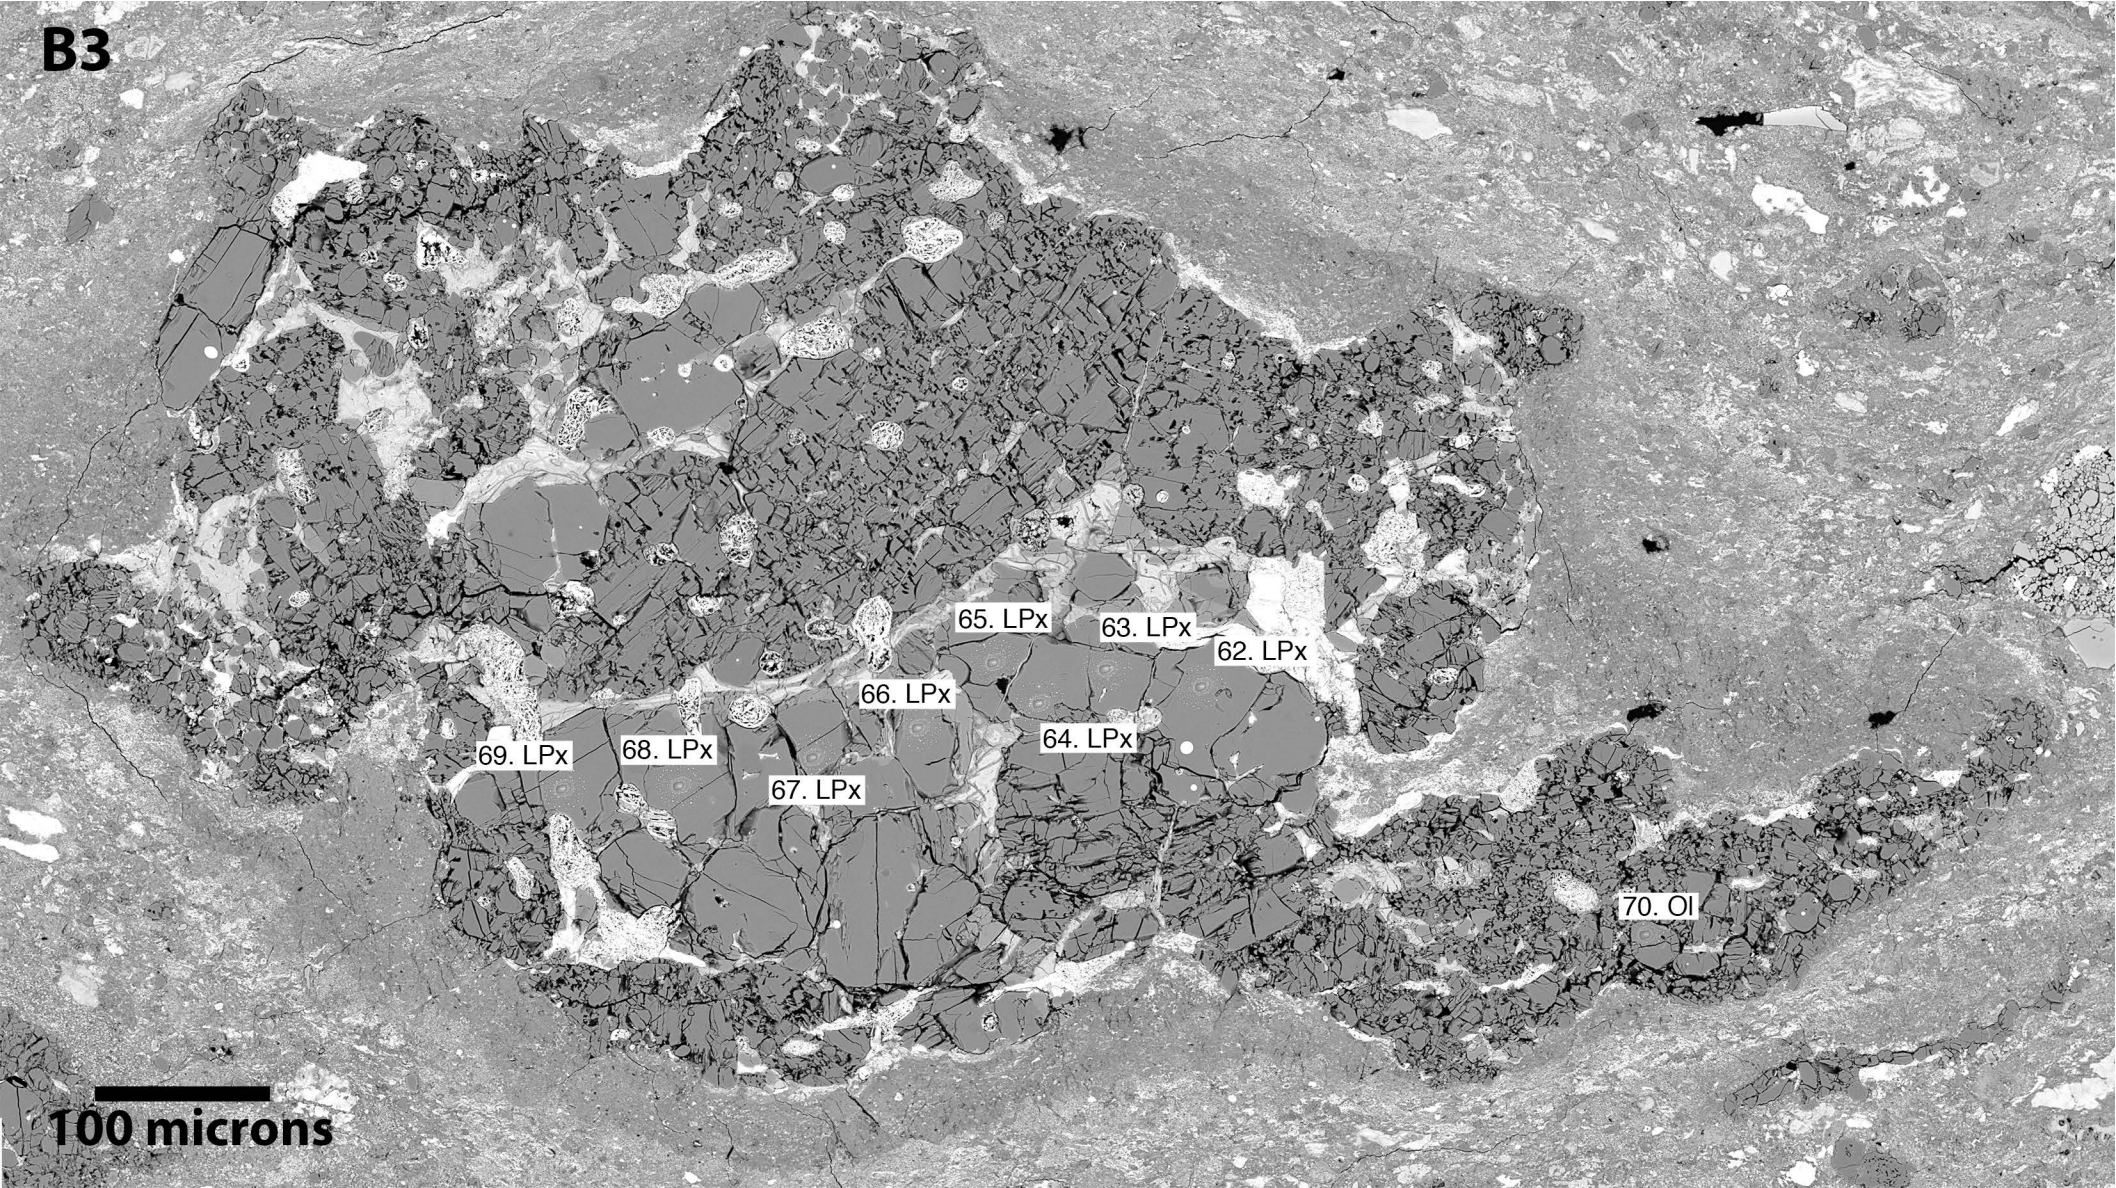

65. LPx

63. LPx

62. LPx

66. LPx

64. LPx

69. LPx

68. LPx

67. LPx

70. OI

**100 microns**

**A8**

54. LPx

55. OI

56. OI

61. OI

57. OI

58. OI

60. OI

59. OI

**100 microns**

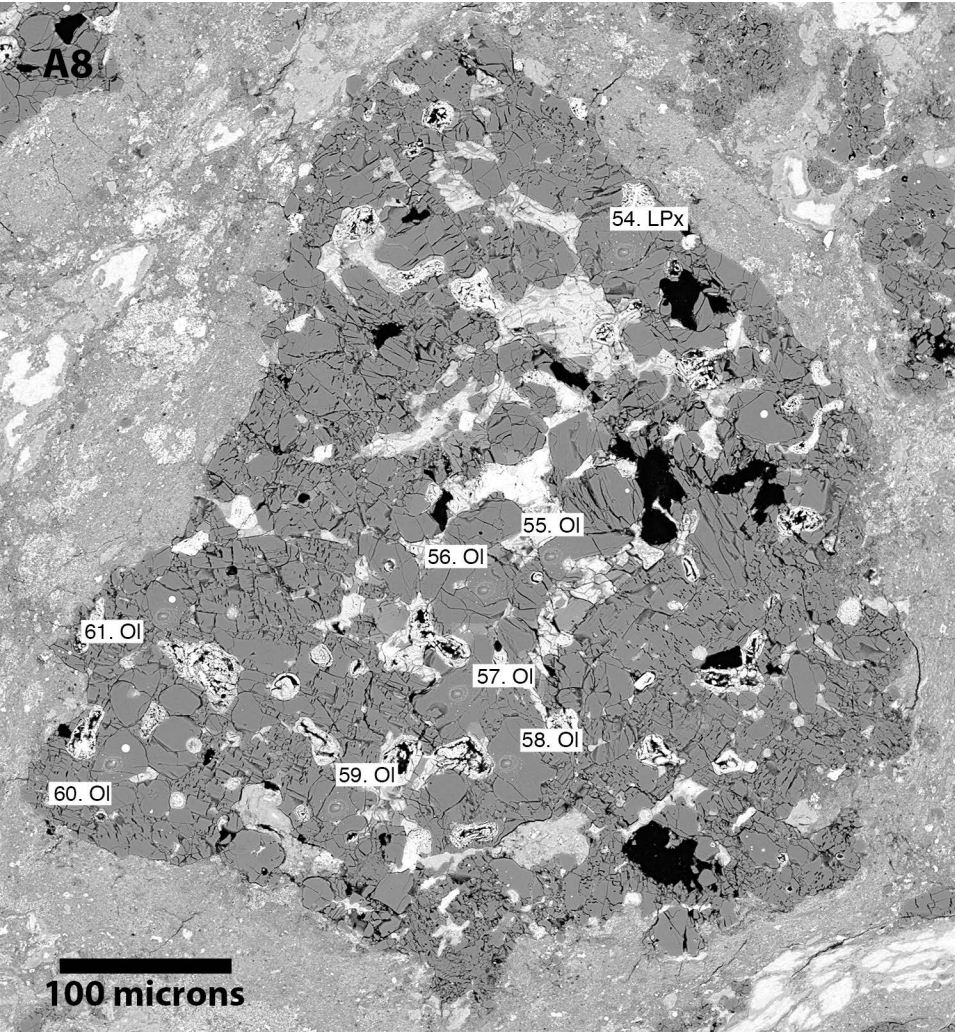

**A4**

41. LPx

47. OI

48. LPx

46. OI

44. OI

49. LPx

43. OI

45. OI

42. LPx

**150 microns**

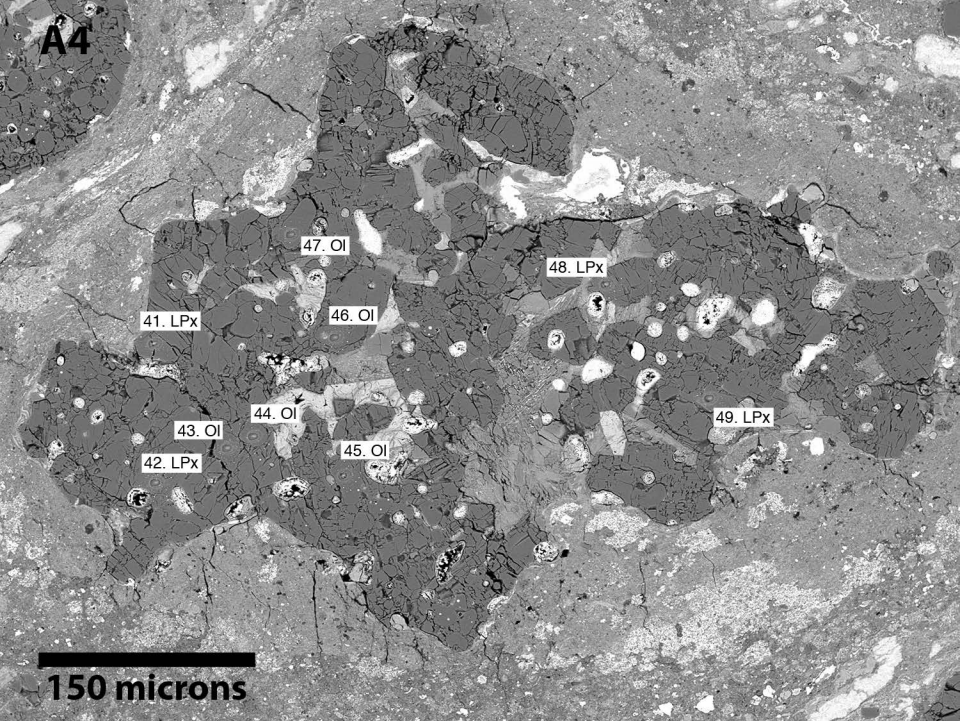

**C10**

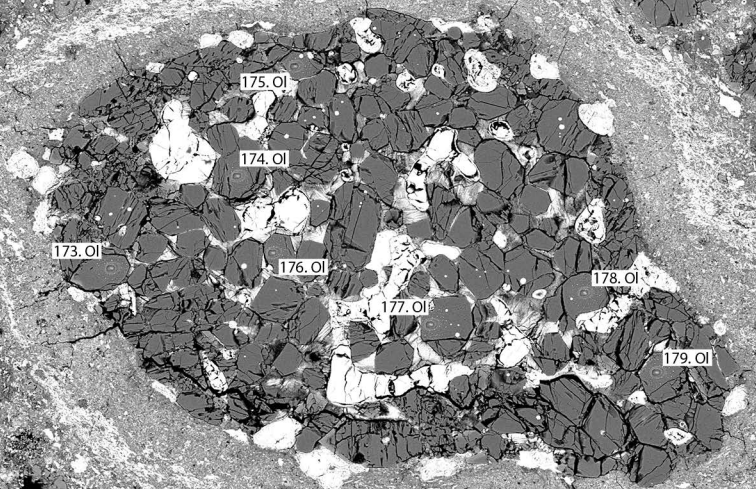

**100 microns**
